# Supplementary material
Source: publisher figshare collection journal article supplement (https://sage.figshare.com/ndownloader/files/18531299)
Supplement: Supplementary file 1 [file 18531299]

1	4	2	3	3	5	4	4	2	1	5	4	4	2	2	4	4	4	2	2	5	4	3	3	2	5	3	4	4	2	4	4	4	2	4	5	4	2	4	2	5	4	4	3	5
2	5	4	4	4	4	2	4	4	2	5	4	5	5	2	4	4	5	4	2	4	4	2	2	4	4	4	4	5	4	5	4	4	4	4	2	4	5	4	4	4	4	4	4	4
2	4	2	5	4	4	4	5	4	2	4	4	5	5	2	3	4	4	5	2	4	4	5	5	4	4	4	5	5	2	5	4	5	5	5	4	4	5	5	4	4	4	5		3
2	5	2	3	4	4	4	2	4	4	4	4	5	4	3	4	4	3	3	2	4	2	3	5	4	3	2	2	1	5	3	2	4	3	3	4	4	3	3	4	4	3	3	4	2
2	3	4	4	5	3	4	5	5	5	5	4	5	5	4	3	5	1	5	5	4	2	5	5	5	4	4	4	5	5	3	2	5	5	4	4	4	5	5	5	3	4	5	4	2
1	4	4	5	5	5	5	2	5	4	5	5	5	5	4	5	4	2	5	5	5	4	5	5	5	5	5	4	5	5	5	5	5	5	5	5	4	4	4	5	5	5	5	5	5
2	4	2	4	5	5	3	5	3	1	5	5	3	5	1	4	4	4	3	2	5	4	5	4	4	5	5	4	4	5	3	5	5	4	4	2	5	5	4	3	3	2	4	4	2
2	4	3	3	4	3	4	3	4	4	4	3	5	4	3	3	3	4	4	4	4	3	4	4	4	3	3	3	3	3	4	4	3	4	4	3	3	4	4	4	4	2	4	4	3
2	2	5	4	5	3	3	5	5	5	5	4	5	5	5	3	4	5	4	2	3	2	5	5	4	4	2	5	5	5	5	5	5	4	4	5	5	5	4	5	4	4	5	4	3
2	5	5	4	5	4	3	5	4	3	3	4	5	4	2	3	4	4	4	4	3	4	4	5	4	3	3	5	4	5	3	4	5	4	4	2	4	5	4	3	3	4	5	4	1
1	4	2	3	4	3	3	5	2	2	5	4	4	4	1	2	2	4	4	5	4	4	4	3	4	4	4	2	4	2	3	4	4	3	3	2	4	4	4	1	3	2	5	2	1
1	3	4	4	5	4	4	4	3	4	3	4	5	5	2	4	3	4	4	3	4	3	4	4	4	4	4	3	4	3	3	4	5	4	4	4	4	4	3	3	4	3	4	3	2
2	5	3	5	5	5	5	4	5	3	5	5	5	5	4	1	5	3	5	4	4	5	5	5	3	4	4	4	5	3	4	5	4	5	2	2	5	4	5	5	4	4	4	4	1
2	4	2	5	4	5	4	5	5	2	5	4	2	5	1	5	5	5	4	1	5	4	4	5	4	4	4	5	5	2	5	1	4	4	4	5	4	4	2	2	4	4	4	2	5
2	1	5	5	5	2	2	4	2	2	2	4	5	4	2	1	4	5	4	5	2	2	4	5	4	2	2	4	5	5	4	2	5	4	4	2	4	4	4	4	4	4	4	2	2
2	3	3	4	4	3	2	4	4	3	3	3	5	5	2	4	4	4	4	1	4	3	4	4	4	3	3	3	4	3	4	3	4	4	4	2	3	5	4	2	3	3	4	4	1
2	5	5	5	5	2	4	4	2	5	5	3	5	3	4	1	4	4	5	5	1	2	2	5	4	1	2	5	4	4	1	4	5	4	5	5	2	5	5	2	4	1	5	4	1
2	3	4	5	1	3	2	4	5	3	5	1	5	5	4	3	2	5	4	1	4	2	5	3	2	2	1	4	4	1	5	1	5	3	4	2	2	5	4	3	4	5	5	4	5
1	4	4	4	4	3	4	4	4	4	4	4	5	4	4	2	3	4	4	4	4	4	4	4	4	4	4	4	4	4	4	4	4	4	4	3	4	4	4	4	4	2	5	3	2
2	4	4	5	5	5	5	5	4	4	5	4	5	5	4	5	5	5	5	4	4	4	4	5	4	5	4	5	5	4	5	4	5	4	4	5	4	4	5	4	5	5	4	4	2
1	2	2	4	5	5	2	3	5	4	4	3	5	5	3	5	3	4	5	4	5	3	4	5	4	5	4	3	4	5	4	3	3	5	5	5	3	4	5	5	4	4	4	4	3
2		2	4	5	3	3	4	3	3	4	3	5	3	4	2	3	4	3	4	2	3	4	4	3	3	3	5	4	5	5	4	4	3	2	3	3	4	3	4	3	4	4	3	4
2	4	2	5	5	4	5	4	5	4	4	5	5	5	4	4	5	2	5	4	4	5	2	5	5	4	4	5	5	5	4	4	4	5	4	4	4	4	5	4	4	4	4	4	2
2	5	3	5	5	5	2	5	2	4	5	5	5	5	2	1	4	4	5	5	5	4	5	5	4	5	5	3	5	2	4	2	4	5	4	5	4	2	5	3	4	5	4	5	1
1	2	4	4	5	4	2	4	2	2	5	2	5	5	3	3	2	4	3	5	4	4	2	2	4	4	3	4	4	5	3	2	4	4	4	4	2	3	3	4	4	2	4	3	1
2	5	2	5	3	4	4	5	4	4	4	4	5	5	2	2	4	4	5	2	4	5	5	3	3	2	5	5	5	2	4	5	4	5	4	4	5	4	5	2	4	4	4	4	1
1	5	2	4	3	4	4	4	4	2	4	2	4	5	2	3	4	5	2	3	4	3	5	2	4	4	4	3	4	2	2	2	4	4	2	1	1	2	3	3	4	2	4	3	1
1	2	4	3	4	4	2	4	2	4	4	3	5	5	3	4	3	4	2	4	3	2	4	3	4	3	3	4	4	4	3	2	5	4	4	3	3	4	4	4	5	3	4	3	4
1	4	4	3	4	4	2	4	3	4	4	4	5	4	3	4	2	4	4	4	4	2	4	4	4	4	4	4	2	4	4	2	4	4	4	4	4	3	4	4	4	4	4	4	4
1	2	4	4	5	5	3	4	5	5	4	2	5	5	5	3	3	4	4	5	4	2	4	2	5	5	2	4	4	4	4	2	4	4	5	2	4	4	4	4	4	4	4	4	1
2	3	2	5	4	1	1	4	5	3	3	2	5	5	2	4	2	4	5	3	1	3	4	4	3	1	4	4	5	3	4	4	5	4	3	2	3	5	5	3	2	4	5	5	3
2	4	2	4	2	2	2	4	2	2	5	2	2	5	2	2	2	4	4	2	2	2	4	2	4	2	2	2	4	2	5	2	5	4	3	2	4	4	4	5	4	4	5	4	4
1	4	2	4	4	5	3	4	4	2	5	4	4	4	2	4	5	4	4	4	5	5	3	4	4	4	5	3	5	2	4	4	4	4	4	5	4	3	4	5	5	4	4	5	5
1	4	5	4	5	4	3	4	3	4	4	3	5	4	3	4	3	4	5	5	4	3	4	5	3	4	4	5	5	5	4	5	4	4	4	3	4	5	4	3	3	3	4	5	1
1	4	2	5	5	5	2	4	5	4	5	4	5	5	4	4	4	4	5	4	4	2	3	5	5	5	4	4	5	2	3	2	4	5	5	4	3	4	5	4	3	2	4	5	1
2	3	4	5	4	4	2	5	4	4	4	4	5	5	3	5	4	5	4	4	5	1	4	4	5	5	3	3	5	4	5	2	5	5	5	3	4	4	5	4	5	4	5	4	3
1	3	2	4	1	4	5	4	2	2	5	5	5	5	2	4	4	4	2	2	5	2	4	2	3	4	3	2	4	2	4	2	4	4	4	4	3	2	3	2	3	3	4	2	2
1	3	2	5	4	5	4	1	4	3	5	4	3	5	2	5	5	1	5	4	5	5	4	5	3	5	5	2	5	2	4	5	1	4	4	5	4	2	5	4	5	5	3	4	4
1	3	2	4	5	4	2	3	5	3	3	2	5	5	4	1	3	3	5	3	4	3	4	4	4	4	3	4	4	4	1	4	3	5	3	4	4	3	4	4	4	2	4	4	1
1	5	4	5	5	4	4	4	3	4	5	4	5	5	4	4	4	5	5	5	5	5	4	5	1	4	4	3	5	2	5	5	5	5	4	5	4	5	5	5	4	5	4	4	5
1	4	4	4	4	4	4	4	4	2	4	4	4	4	2	4	4	4	4	4	4	4	4	4	4	4	4	4	4	3	4	4	4	4	2	4	4	4	3	4	4	4	4	2	4
1	2	3	4	4	4	1	3	3	4	3	2	5	4	4	4	3	3	3	3	3	2	4	2	4	3	3	2	4	3	4	2	3	3	4	4	3	4	4	4	3	4	4	4	4
2	4	2	5	4	5	1	4	4	4	5	2	5	5	2	5	4	5	4	4	5	1	5	4	4	5	4	5	5	2	5	2	5	4	5	4	4	5	5	4	5	5	4	1	5
2	4	5	5	5	5	2	5	5	4	5	5	5	5	4	2	5	5	5	5	4	4	5	5	5	5	4	5	5	5	4	3	5	5	5	1	4	5	5	5	4	5	4	5	4
1	4	5	4	4	4	4	4	2	1	5	2	5	4	4	4	2	5	4	2	5	1	2	3	2	4	2	4	4	4	5	2	4	3	2	1	2	5	4	2	4	5	2	2	5
2	5	4	4	2	4	2	3	3	3	4	4	3	5	3	3	3	4	4	3	4	3	2	4	4	4	5	2	3	2	3	3	2	4	4	3	4	2	4	4	4	3	3	3	3
2	4	5	4	5	3	4	5	4	4	4	4	5	5	4	4	5	4	4	4	4	4	4	5	5	3	4	4	4	5	4	5	5	4	4	2	5	5	5	5	4	2	5	4	2
1	3	4	4	3	4	2	4	1	2	4	2	4	4	2	4	4	4	4	2	4	2	4	2	4	4	2	2	3	4	4	2	4	4	2	4	2	4	2	2	4	4	4	2	4
1	2	2	4	5	3	4	4	4	4	4	4	4	4	4	4	4	4	5	5	4	5	4	4	4	4	4	5	4	5	3	5	4	4	4	4	4	2	4	5	4	3	4	4	2
1
1	3	3	4	5	4	3	4	3	4	3	4	4	5	3	2	2	4	4	4	4	3	5	5	4	4	3	4	3	4	2	3	3	4	4	3	3	3	4	4	3	3	3	4	3
1	3	5	4	5	4	2	4	2	4	4	3	5	5	4	4	4	4	4	4	4	2	4	5	4	4	2	4	4	4	3	4	4	4	4	4	3	4	4	4	3	2	4	4	1
1	4	2	4	4	4	3	4	3	4	5	4	5	4	2	4	4	4	4	3	4	2	4	5	4	5	4	3	4	3	5	3	4	4	3	4	4	4	4	4	4	5	4	4	4
1	2	2	4	4	2	4	4	3	2	5	4	4	5	2	2	3	4	5	2	4	3	4	5	4	2	2	4	4	3	5	4	2	4	2	3	4	2	3	2	5	4	4	2	5
1	1	2	4	4	4	2	4	4	2	3	2	5	4	2	3	3	5	5	3	4	1	4	3	3	4	3	4	3	3	4	4	4	4	2	2	4	4	4	2	4	5	5	2	3
1	4	5	5	5	4	2	4	4	4	4	4	5	5	2	5	4	5	4	2	5	2	5	4	5	4	4	2	5	2	5	2	5	4	4	2	4	2	4	4	5	5	5	2	4
2	5	4	5	5	5	5	5	4	5	4	3	5	5	4	3	5	3	5	5	4	5	5	3	5	5	4	5	4	4	4	5	5	5	4	3	5	5	4	5	3	5	5	2	4
2	2	3	4	1	4	2	5	2	1	4	1	5	4	1	5	3	3	4	2	5	2	2	2	1	4	3	4	4	1	5	4	4	4	4	2	4	4	5	1	3	2	4	4	3
1	4	3	4	5	4	3	4	2	5	5	3	4	5	4	3	3	4	4	5	4	3	4	3	5	4	4	5	4	4	4	3	4	5	5	5	4	5	4	5	3	3	5	5	3
1	5	4	4	5	5	5	4	5	4	4	5	4	5	3	4	5	4	5	4	4	4	4	5	4	4	5	4	5	5	4	5	4	4	4	3	4	4	4	4	4	3	5	5	3
1	4	4	4	3	4	2	4	4	3	4	4	3	4	2	4	4	4	4	2	4	2	4	4	4	4	4	3	4	2	5	3	4	4	4	4	4	4	4	2	4	5	4	4	5
1	3	4	4	5	3	2	4	4	5	4	4	5	5	2	3	3	5	4	5	3	4	5	4	4	3	4	4	4	3	4	4	4	4	4	1	3	4	4	4	3	2	4	4	3
1	5	2	4	2	5	4	5	4	4	5	2	5	5	3	4	4	5	5	5	5	5	4	3	5	5	5	4	2	2	5	4	4	4	5	5	5	4	4	4	4	5	5	2	5
1	4	5	1	5	5	2	5	5	5	4	4	5	5	4	4	4	4	5	5	5	2	5	5	5	4	4	5	5	5	4	4	5	5	5	4	5	5	5	5	4	2	5	2	2
1	3	3	2	3	3	2	3	2	3	4	2	1	4	2	3	2	3	4	3	3	2	2	3	3	3	3	2	2	3	2	3	2	3	3	4	2	3	3	3	4	4	3	3	4
1	4	3	5	2	4	1	4	3	3	5	4	5	5	2	4	5	5	5	2	5	2	4	2	3	4	3	5	5	4	5	3	4	5	4	2	4	5	5	3	4	5	4	2	5
1	4	5	4	5	5	2	5	5	4	4	2	5	5	5	4	4	5	5	4	4	4	5	5	4	4	4	5	5	5	5	5	5	4	4	4	4	5	4	5	4	5	5	4	4
2	5	4	5	5	4	4	5	2	5	5	5	2	5	5	2	5	5	4	5	5	4	5	4	5	4	4	5	5	5	1	4	4	4	5	4	5	2	5	5	1	1	5	5	1
1	5	4	5	5	5	5	5	5	5	5	5	5	5	5	5	5	4	5	5	5	4	5	5	5	5	5	4	4	5	5	5	5	5	5	4	5	5	3	5	5	5	5	5	5
1	4	5	5	5	5	5	4	4	5	5	5	5	5	4	5	4	5	5	4	4	3	4	5	5	5	4	4	5	5	4	3	5	5	5	5	4	5	5	5	5	4	4	5	3
1	4	4	5	5	5	5	4	5	4	5	4	5	5	4	4	4	4	5	5	2	4	4	5	4	4	4	4	5	3	4	2	5	5	4	1	4	5	5	5	4	2	4	2	2
1
1	3	4	3	5	4	2	4	2	4	5	2	5	5	2	4	2	5	4	2	5	2	5	2	5	4	4	5	4	2	5	2	5	4	4	4	5	5	4	2	4	5	4	2	5
1	4	5	5	5	4	2	4	3	2	4	5	5	4	2	3	4	5	5	3	5	2	5	3	4	5	4	5	5	3	4	2	5	5	4	5	4	3	4	5	5	4	5	5	4
1	3	4	3	4	3	3	4	2	4	4	2	4	3	4	3	3	4	2	4	2	4	4	2	4	3	2	4	2	3	4	2	4	2	4	4	3	3	3	4	4	2	4	2	3
1	4	4	4	4	3	4	5	3	4	4	4	5	4	3	4	4	5	4	4	3	4	5	5	4	2	4	5	4	4	4	5	4	4	3	2	4	5	4	5	4	5	5	4	1
1	2	5	4	5	2	2	4	4	5	5	1	5	5	4	1	2	4	4	4	2	2	4	4	4	2	4	5	4	4	3	4	4	4	4	2	4	5	4	5	2	2	5	2	4
2	4	3	5	5	4	5	4	5	4	5	4	3	5	2	5	4	4	5	3	3	3	5	5	4	4	5	5	5	3	5	2		5	4	5	4	2	4	3	4	4	4	5	4
1	4	4	3	5	3	2	4	2	2	5	3	5	5	2	2	3	4	1		3	2	5	2	2	4	2	5	4	4	4	2	4	2	3	4	4	5	4	2	4	4	4	1	4
1	3	2	3	4	5	4	3	2	2	5	4	3	4	1	5	5	2	2	2	5	4	2	4	3	5	3	3	4	3	4	2	2	4	2	5	2	2	4	3	5	4	3	3	4
1	3	4	4	5	4	3	5	2	5	5	3	5	5	2	4	3	5	4	4	4	3	5	5	4	4	4	4	3	3	4	4	5	4	4	3	4	5	4	5	4	3	4	4	5
1	4	4	4	3	4	3	4	4	3	4	3	4	4	2	3	3	4	4	2	4	4	4	4	4	4	2	4	4	3	2	4	4	4	3	4	4	4	4	2	4	2	4	4	2
1	2	4	4	5	3	2	4	4	2	4	3	5	5	2	2	2	4	4	4	4	2	4	5	3	3	2	5	4	4	5	4	3	4	2	5	2	4	4	2	2	5	4	4	4
2	5	3	4	4	4	3	4	3	3	4	5	4	4	2	2	3	5	4	3	4	4	5	3	3	4	3	5	4	3	3	5	4	3	3	3	5	5	3	3	3	4	4	3	2
1	2	3	3	4	3	2	3	3	4	3	3	4	4	3	3	2	3	4	4	3	2	4	3	4	3	2	3	4	4	3	2	3	3	4	3	2	2	3	4	3	3	3	4	2
1	3	2	2	2	4	2	4	3	3	4	2	5	4	3	4	3	4	4	3	4	2	4	4	4	4	2	3	3	2	4	4	5	4	3	4	4	5	3	3	4	5	4	3	4
1	5	4	5	4	5	4	5	5	3	5	5	5	5	2	5	5	5	5	2	5	4	5	5	5	5	5	4	5	2	4	4	5	5	4	4	5	4	5	2	5	5	5	3	4
1	2	4	4	4	4	4	4	4	4	5	4	5	4	4	4	4	4	5	4	4	2	4	2	5	4	4	2	4	4	5	4	4	4	4	4	4	4	4	4	4	5	4	4	4
2	4	4	4	4	3	4	4	3	3	4	2	5	5	5	2	4	4	2	4	4	5	2	4	4	3	4	5	4	4	3	4	4	4	3	3	5	4	4	5	4	3	5	3	3
1
1	2	5	4	5	4	2	4	2	4	5	2	5	5	3	4	3	5	3	4	5	1	5	3	5	5	2	3	4	5	5	2	5	4	4	3	3	5	4	5	2	5	4	3	4
1	2	3	2	5	3	2	4	3	4	4	3	5	4	3	3	2	5	2	4	4	3	4	2	3	4	2	5	3	3	4	2	5	3	3	4	3	5	3	4	4	5	4	2	4
1	4	4	4	3	5	4	5	2	3	5	3	5	4	2	5	3	5	2	2	5	3	4	2	4	5	4	3	3	2	4	4	4	3	4	4	4	5	3	4	5	5	4	2	5
1	3	4	4	5	4	2	4	4	4	3	3	5	5	4	3	3	5	3	4	3	3	4	4	5	4	4	4	5	4	5	3	5	4	4	4	4	5	4	3	4	4	4	4	3
1	2	3	4	4	2	2	3	4	2	4	3	5	5	2	1	2	2	5	3	2	2	5	3	4	2	2	5	5	2	2	4	4	5	3	2	2	5	4	2	3	2	4	4	2
1	2	3	5	2	3	1	5	2	1	5	1	5	5	2	2	2	5	4	1	3	1	5	3	3	3	1	3	4	2	5	1	5	4	4	2	3	4	4	1	3	4	5	3	2
1	3	2	4	5	4	4	4	2	4	5	5	4	5	3	3	3	4	4	3	5	4	4	4	4	5	5	2	4	4	3	2	4	4	4	4	4	2	5	4	2	5	4	3	1
2	2	2	5	5	5	2	5	5	1	5	5	4	5	1	4	4	5	5	2	4	2	5	5	4	5	4	2	5	2	5	1	5	5	4	4	4	4	5	2	5	5	5	4	2
1	4	4	4	5	4	1	4	2	4	4	4	5	5	4	3	3	5	4	5	4	2	4	4	5	4	2	5	4	5	4	4	5	3	5	2	4	5	4	5	4	4	4	4	3
1	3	2	5	4	2	2	4	5	4	5	4	2	5	2	5	4	3	4	3	4	3	4	3	4	4	4	2	5	1	4	3	3	4	4	4	4	2	5	4	5	3	4	4	3
1	3	4	4	3	4	2	4	4	4	5	3	4	4	2	4	3	4	4	2	4	2	4	4	3	4	2	4	5	2	4	2	4	4	4	3	4	4	4	2	4	4	4	3	4
1	3	4	4	5	4	2	4	3	2	4	2	4	5	2	3	2	4	4	3	4	2	4	2	4	4	3	3	4	4	3	3	4	4	3	3	3	4	4	4	3	2	4	4	3
1	3	4	4	5	3	2	4	4	4	3	3	4	5	4	3	3	4	5	5	3	2	4	4	5	4	3	3	3	4	3	4	4	4	4	3	4	4	4	5	3	4	4	4	1
1	4	4	4	4	4	4	4	4	4	5	4	5	4	3	4	4	4	4	4	5	4	4	4	4	4	4	4	4	4	4	4	4	4	4	3	4	4	4	4	5	5	4	4	5
1	3	4	4	5	2	2	4	2	4	5	4	4	5	4	2	4	5	5	5	2	4	4	4	5	2	3	5	4	5	4	4	5	4	4	4	4	3	4	5	3	2	4	4	4
2	3	2	4	5	3	2	3	4	3	3	4	4	4	2	3	5	3	4	4	2	4	3	4	4	4	3	5	3	4	2	4	4	4	3	4	4	4	4	4	3	4	3	4	2
2	2	2	4	5	4	2	4	4	2	4	3	5	4	2	4	4	4	4	4	4	2	4	3	4	3	3	5	4	4	4	4	4	4	3	3	3	5	4	3	3	3	3	4	4
1	2	3	5	5	3	3	4	4	3	4	3	5	5	2	4	3	4	5	2	3	1	3	5	5	4	3	3	4	1	3	2	4	4	4	3	2	3	4	2	4	4	4	4	1
2	4	4	5	5	4	3	5	5	4	5	4	5	5	2	3	4	5	5	4	4	4	5	5	4	4	1	5	5	3	5	4	5	4	4	4	4	5	5	5	4	5	5	4	4
2	4	5	5	5	4	2	5	4	4	5	4	5	5	2	3	3	5	4	5	4	2	5	4	5	4	3	5	5	4	4	4	5	5	4	3	5	5	4	4	4	4	4	3	4
2	4	3	5	4	4	3	4	4	4	4	4	4	5	3	4	5	2	4	3	5	2	3	4	3	4	4	2	4	3	5	3	4	4	4	3	4	3	4	3	4	4	4	4	3
1	2	2	5	5	3	2	4	4	5	4	2	5	5	3	3	2	5	5	5	2	2	4	4	5	2	4	2	4	2	4	4	4	4	5	5	2	4	4	5	2	2	4	3	2
1	1	4	2	4	2	2	4	4	4	2	2	5	4	3	3	2	4	4	4	3	1	4	4	3	1	2	2	4	2	2	2	4	4	4	2	2	4	4	4	2	2	4	3	2
1	1	2	5	4	5	1	3	4	4	5	5	5	5	3	5	3	2	4	4	4	1	2	4	4	4	4	2	5	4	5	1	4	5	5	5	2	2	4	5	5	5	3	5	5
1	4	2	4	4	4	4	4	2	1	3	2	2	5	2	3	2	2	2	1	5	5	2	4	1	4	3	2	4	2	4	4	4	4	2	2	5	2	4	1	2	2	5	2	2
1	4	2	4	4	2	3	3	4	2	5	5	5	5	1	3	4	4	4	3	4	4	4	5	4	4	3	3	4	3	5	2	5	5	3	4	4	3	4	3	5	4	4	4	4
1	3	4	4	3	4	2	4	2	4	5	4	4	5	4	4	4	4	3	2	5	2	4	4	4	4	3	4	4	2	4	2	4	4	4	5	4	4	4	4	5	4	5	2	3
1	4	3	4	1	4	2	4	3	2	4	2	4	5	2	4	2	4	4	1	4	2	4	3	3	4	5	1	5	2	3	1	3	3	4	2	2	2	4	4	4	1	3	2	1
1	2	3	4	5	4	2	4	4	4	4	2	5	5	4	4	3	4	5	5	3	2	3	5	4	4	3	5	4	5	4	5	4	4	4	4	4	5	5	5	4	4	4	4	4
1	5	4	4	5	4	2	5	4	4	4	5	5	5	2	1	5	5	4	3	4	4	5	4	5	3	4	4	4	3	5	4	5	4	4	4	5	5	4	4	3	4	4	4	4
1	3	5	5	5	5	2	5	5	5	5	5	5	5	5	4	5	5	5	1	5	2	5	5	5	5	5	5	5	5	5	4	5	5	5	5	5	5	5	5	4	5	5	5	5
1	2	2	4	4	2	2	4	4	4	4	4	5	4	4	2	4	3	4	4	3	2	4	4	4	2	2	4	3	4	3	2	4	4	4	2	3	4	4	4	3	3	4	3	2
1	5	3	4	5	5	4	4	3	4	5	5	4	5	2	4	4	4	5	5	5	4	4	5	4	5	5	3	5	3	5	4	4	4	4	5	5	4	5	5	5	4	5	4	4
2	3	4	5	4	3	4	4	5	4	4	3	5	5	2	4	4	4	5	3	3	3	4	4	3	3	4	5	5	4	3	3	5	5	4	4	3	5	5	4	3	2	4	4	1
1	1	4	4	5	5	2	4	4	5	5	2	5	5	5	5	3	4	3	5	5	1	4	2	5	5	1	4	5	2	4	2	5	5	4	5	2	5	5	5	5	3	2	4	4
2	3	2	5	5	4	2	4	5	5	5	4	4	5	2	4	3	2	5	5	5	2	4	4	5	4	3	4	5	1	5	5	5	5	5	3	2	2	5	4	5	5	4	3	2
1	5	2	5	5	3	4	5	5	3	4	3	2	5	2	2	5	5	5	4	5	4	5	4	4	3	4	5	4	5	4	2	5	4	3	4	5	5	5	4	4	5	5	4	2
2	4	3	3	4	4	3	4	4	4	5	4	4	5	2	4	4	4	4	2	5	3	3	4	4	4	4	2	5	4	5	3	3	4	5	4	3	3	5	4	4	4	4	4	5
2	4	4	4	4	4	3	5	4	5	4	4	5	5	4	3	3	5	4	5	4	4	4	4	5	4	2	4	5	4	4	4	5	5	5	2	4	4	5	5	4	4	5	4	2
2	4	2	5	5	4	4	4	5	4	4	4	5	5	4	2	2	4	5	4	2	4	4	5	4	1	4	4	5	5	2	4	4	5	2	5	4	2	5	5	1	5	5	5	1
2	4	4	4	5	4	5	4	2	4	4	4	4	4	2	4	4	4	4	5	4	5	5	5	5	4	5	3	4	4	4	4	5	4	4	2	4	2	4	5	4	3	4	4	4
1	1	2	4	4	2	1	4	4	4	5	2	5	4	4	3	2	4	4	4	4	1	4	1	5	2	1	1	4	2	5	1	4	4	5	5	2	5	2	5	4	5	2	4	5
1	5	2	4	3	4	4	5	2	3	5	3	4	5	2	3	5	4	2	3	4	2	5	4	3	4	4	4	4	2	4	3	4	4	4	4	5	4	4	4	4	5	5	3	4
2	2	2	5	1	2	1	2	4	2	4	2	5	5	2	2	2	2	4	5	2	2	4	4	4	4	4	2	4	4	4	1	4	5	4	4	1	4	5	4	5	2	4	4	2
2	3	4	4	2	3	3	4	4	3	4	3	5	4	2	3	3	4	3	3	4	2	4	2	4	3	3	3	4	3	4	2	4	3	4	4	3	4	4	4	4	3	4	4	3
1	2	4	4	5	4	2	4	4	4	4	4	5	5	4	2	3	4	4	4	3	2	5	5	4	4	4	5	4	5	4	2	4	4	4	4	3	4	4	4	4	4	4	4	2
2	4	5	5	4	4	1	5	2	4	5	5	5	5	2	3	4	5	5	2	4	1	5	5	4	4	4	5	5	4	5	2	5	5	4	4	5	5	5	2	4	2	5	2	4
1	3	4	5	5	4	4	4	4	4	3	4	5	4	3	5	4	4	5	4	3	3	4	4	4	3	5	3	4	4	2	3	4	5	4	3	4	4	4	4	3	2	4	4	3
1	4	2	4	5	3	2	4	4	5	4	4	4	5	4	3	4	4	4	4	4	4	5	4	5	4	4	3	5	2	2	3	4	4	5	4	3	2	4	4	3	2	4	4	2
2	4	2	4	3	4	2	4	4	2	3	3	3	4	2	2	3	2	5	4	4	3	4	5	4	4	4	3	4	2	5	2	3	4	3	3	4	2	4	3	4	5	4	3	4
1	4	2	4	5	4	3	4	4	3	4	4	5	4	3	3	2	4	4	4	3	3	4	4	2	2	3	4	4	4	4	4	4	4	3	2	2	4	4	4	3	3	4	4	2
2	4	5	4	5	2	4	4	2	4	5	2	5	5	5	1	2	4	1	5	2	4	4	2	4	1	2	4	4	5	4	2	4	4	4	4	4	5	2	4	4	2	4	2	1
1	2	2	4	5	5	2	5	5	4	5	4	4	5	1	5	5	5	5	4	5	2	3	5	4	5	4	4	4	5	5	1	5	5	4	5	2	5	5	2	5	5	5	4	5
1	4	3	4	5	4	4	4	1	4	4	4	4	5	2	3	4	4	4	5	4	4	2	2	4	3	5	4	5	2	5	4	3	4	3	5	4	1	5	3	3	2	5	5	2
1	1	3	4	5	3	1	4	4	4	4	2	5	5	2	4	2	4	4	2	4	1	4	2	5	3	3	2	5	2	4	2	4	4	4	2	2	4	4	4	4	2	4	2	2
1	5	1	5	2	5	5	2	2	4	5	4	3	5	1	5	4	1	2	2	5	5	2	5	2	4	5	2	4	2	5	5	4	5	2		4	2	4	2	5	5	4	2	5
1	4	4	4	5	4	3	4	3	4	4	4	4	4	4	4	4	4	4	4	4	4	4	4	4	4	4	4	4	4	4	4	4	4	4	4	4	4	4	4	4	3	4	4	3
1	1	2	4	5	5	2	5	4	5	5	5	5	5	2	5	5	5	4	5	5	5	5	4	5	5	5	4	5	2	5	5	5	4	5	5	5	5	5	5	5	5	5	3	5
2	4	4	5	5	5	5	5	5	5	5	5	5	5	3	1	5	5	5	5	4	5	5	5	5	4	3	5	5	5	5	5	5	5	5	4	5	4	5	5	3	4	5	5	4
1	4	2	5	5	4	2	5	2	4	4	4	2	5	4	4	4	2	4	2	5	4	5	5	4	4	4	5	5	5	4	4	5	5	4	4	4	4	4	4	5	3	4	4	1
1	4	2	5	5	4	2	4	4	4	4	4	5	5	2	4	3	2	5	5	4	2	2	5	5	5	3	2	5	4	4	2	4	5	5	2	2	4	4	4	4	4	4	5	2
1	2	4	4	4	2	2	4	3	3	4	2	5	4	3	3	3	4	4	2	3	2	4	4	3	2	2	4	4	3	3	4	4	4	4	2	3	4	4	2	3	2	4	4	4
1	4	3	5	3	5	4	2	3	4	5	4	5	5	3	4	4	3	5	3	5	4	3	5	5	5	5	2	4	4	3	4	3	4	4	4	3	3	4	4	5	3	4	4	3
1	4	3	5	4	4	3	4	4	5	5	3	5	5	4	4	4	4	4	5	4	3	3	4	5	4	5	3	4	4	4	4	4	3	3	3	4	3	4	5	5	4	4	2	3
2	5	2	3	1	2	5	3	2	2	5	2	4	4	2	3	3	4	2	1	5	5	5	1	1	1	3	5	2	2	2	1	2	3	1	5	4	5	4	3	1	5	4	2	4
1	4	5	5	2	4	2	4	4	2	4	2	5	5	4	4	2	4	5	5	4	2	4	4	4	4	3	2	4	2	4	2	4	4	4	2	3	4	4	4	4	4	4	4	4
1	2	4	4	4	2	2	4	2	2	4	4	5	4	2	2	4	4	2	2	4	2	4	3	2	3	2	3	4	2	5	2	4	2	2	3	2	3	3	2	3	5	4	2	4
1	3	3	4	3	2	2	4	2	4	5	2	4	5	3	4	2	4	4	2	4	2	4	2	4	3	2	2	4	2	3	3	4	4	4	1	2	3	3	4	4	3	4	3	3
1	3	4	4	4	4	4	4	3	4	4	3	4	4	3	3	3	4	4	3	3	3	4	4	4	4	3	4	4	2	3	2	4	4	3	4	4	4	4	4	4	4	4	3	3
2	4	2	3	4	2	3	3	4	4	4	2	3	4	2	3	2	4	2	4	4	3	3	2	4	3	3	4	3	2	4	2	3	2	4	4	2	3	4	4	4	4	3	2	4
1	4	4	5	5	4	2	4	4	5	4	4	4	5	2	4	4	4	4	2	4	4	4	5	4	4	4	4	5	3	4	2	4	4	4	4	4	4	4	4	4	3	4	4	2
1	5	4	5	4	4	2	4	4	5	5	3	5	5	2	5	5	4	4	2	5	4	4	4	3	5	5	4	4	4	3	4	4	4	5	5	4	4	4	4	5	3	4	2	4
2	5	4	4	5	2	2	5	2	4	5	5	5	4	2	2	5	5	4	3	4	4	4	5	4	1	1	5	4	5	4	2	5	4	4	2	5	5	4	4	2	4	5	2	4
1	5	4	5	5	4	4	3	2	5	5	4	5	5	2	5	5	4	2	2	5	4	4	4	5	5	5	2	3	5	3	5	4	4	5	4	5	2	5	4	5	3	4	2	2
2	2	2	3	4	2	2	4	2	4	2	4	4	4	4	4	4	4	2	4	4	2	4	4	4	2	2	4	3	4	2	2	4	2	4	3	2	4	4	4	4	2	4	3	2
1	3	3	4	5	4	4	5	3	5	4	4	5	5	4	3	3	4	4	4	4	4	5	4	5	3	4	5	4	5	3	5	5	4	4	4	4	4	4	4	3	3	4	3	2
1	3	4	4	4	4	2	4	4	4	4	4	5	4	3	3	4	4	4	4	4	2	4	5	4	4	4	3	4	4	4	4	4	4	4	3	4	5	4	4	4	4	4	4	3
1	5	2	5	5	3	4	4	4	4	5	5	4	5	1	5	4	4	4	4	4	3	4	4	5	4	4	3	4	5	4	2	4	4	4	4	4	3	4	4	4	2	4	4	1
2	4	5	5	4	2	2	4	5	4	5	1	5	5	4	4	4	5	5	3	4		5	4	4	1	1	5	5	3	5	4	5	5	4	3	4	5	4	5	4	3	5	5	4
1	2	5	5	4	5	1	4	5	5	5	4	5	5	4	4	4	5	4	4	5	2	4	5	5	5	4	4	5	5	4	4	5	3	5	4	3	5	5	5	4	2	5	4	4
2	3	4	3	5	3	2	3	4	4	5	4	5	5	4	3	3	4	3	4	5	2	4	5	5	4	3	4	2	5	4	2	4	4	5	2	3	4	2	5	2	4	3	3	4
1	4	5	5	4	5	2	5	2	5	5	3	5	5	2	5	3	4	5	3	5	4	3	4	5	5	3	3	5	2	5	2	5	5	5	4	4	5	5	5	5	5	5	2	5
1	4	3	4	4	3	4	4	4	3	3	3	4	4	3	3	3	4	4	3	3	4	2	3	4	3	2	4	4	4	3	4	4	4	3	2	4	4	4	3	4	3	3	3	2
1	1	4	4	2	3	1	4	3	4	5	1	5	5	2	4	2	5	4	3	3	1	5	3	4	3	2	4	4	2	2	1	5	4	4	2	3	5	3	2	4	1	5	3	1
2	5	2	4	5	3	2	4	4	4	4	5	5	5	2	3	5	3	4	4	4	2	4	5	4	4	4	3	4	4	5	4	4	4	4	5	4	5	5	4	4	5	5	5	5
1	5	1	5	2	2	1	4	4	2	5	4	4	5	1	5	4	2	5	2	4	5	2	4	4	4	5	2	4	1	5	4	4	5	2	5	4	2	5	2	5	5	4	4	1
1	2	3	4	3	4	2	4	4	3	5	2	5	5	3	3	4	3	5	3	4	2	5	3	3	4	3	3	4	3	4	2	4	4	3	1	3	4	5	4	3	4	4	4	4
1	4	4	5	5	4	2	5	5	5	4	4	5	5	5	3	4	5	5	5	4	2	5	5	5	3	4	5	5	5	2	1	5	5	4	5	4	3	5	5	3	4	5	5	2
2	4	5	4	5	3	5	5	4	4	5	4	5	5	2	1	4	2	5	5	4	4	5	5	5	4	3	5	5	5	2	5	5	5	4	5	4	5	5	5	2	3	5	5	1
2	1	3	4	3	3	2	5	5	3	5	4	5	5	2	2	4	5	4	2	3	2	5	4	4	2	2	5	4	2	4	2	5	5	4	3	4	5	4	2	5	4	5	4	3
2	5	2	4	2	4	4	4	3	2	4	4	3	4	2	4	4	4	3	2	4	4	4	4	2	3	4	4	4	2	4	4	4	3	2	2	4	4	3	3	3	3	4	2	3
2	5	2	5	4	4	1	5	5	2	4	5	5	5	1	5	4	5	5	1	5	5	4	5	5	4	4	5	5	5	4	5	5	5	5	2	4	4	5	1	5	2	4	2	5
2	5	1	2	2	4	5	5	5	2	5	2	5	5	1	1	4	5	5	2	4	4	4	1	4	2	5	5	4	2	5	2	5	4	2	5	4	5	5	5	3	5	5	2	4
2	4	4	5	5	4	4	5	4	4	5	5	4	5	2	4	5	5	4	5	4	4	5	4	4	4	5	4	5	4	5	3	5	5	4	3	5	2	5	4	4	4	4	4	4
2	5	4	4	3	4	4	4	3	4	5	2	5	5	3	3	2	5	4	4	4	4	5	4	5	5	4	4	4	3	5	4	5	4	3	5	4	4	4	4	2	5	5	4	4
2	2	2	4	4	4	2	4	4	2	5	5	5	5	2	4	2	5	4	1	4	2	5	5	4	4	4	4	5	4	5	2	4	4	2	2	2	4	2	2	4	2	5	4	1
1	4	2	5	4	4		4	4	4	5	4	5	5	2	4	4	4	5	2	4	2	4	5	5	4	2	5	5	4	5	4	4	5	4	4	4	5	5	4	4	4	5	4	4
1	2	4	4	3	5	2	4	2	2	5	4	5	5	1	4	3	4	3	4	5	2	4	4	3	5	2	1	5	1	5	2	4	3	3	5	1	2	5	5	5	4	5	4	1
1	2	2	5	5	5	2	4	4	5	5	4	5	5	4	4	4	3	5	2	4	3	5	5	5	5	4	5	5	5	4	4	4	5	5	4	4	5	5	5	5	4	4	5	2
2	1	5	4	1	2	3	5	4	1	3	2	3	4	1	1	2	5	4	1	2	1	5	4	1	2	3	4	3	2	4	2	5	4	1	3	1	4	3	1	2	4	4	2	1
2	5	4	5	5	3	3	4	5	2	4	3	5	5	4	4	3	5	5	3	4	3	5	5	4	2	4	5	5	5	4	5	5	5	4	2	4	5	5	4	4	3	4	5	4
1	2	3	4	5	5	2	3	5	4	5	5	5	5	1	5	4	5	5	3	5	2	5	5	5	5	3	2	5	4	3	2	4	5	4	4	3	5	4	3	4	2	4	3	4
1	4	3	4	3	4	2	5	3	2	3	3	4	5	3	3	4	5	3	3	4	3	5	2	3	3	4	4	3	3	4	3	5	4	3	2	5	4	3	3	3	4	4	3	3
1	3	5	4	5	5	4	4	4	5	4	5	5	5	4	5	4	4	4	5	5	4	5	5	4	5	5	4	5	5	3	4	4	4	5	5	4	4	5	5	3	2	4	4	2
1	4	3	5	2	4	3	4	2	4	5	3	3	5	2	5	4	4	4	5	4	4	4	5	4	4	5	2	5	3	4	3	4	5	4	4	4	3	4	5	5	5	4	4	2
2	4	4	4	5	4	2	5	4	4	2	4	5	5	4	4	4	5	5	4	2	2	5	4	4	2	4	4	5	2	2	2	5	5	4	2	4	4	5	4	4	2	4	4	1
2	5	3	4	3	4	3	4	4	2	5	3	5	5	2	5	3	5	4	3	5	3	4	5	4	4	3	5	4	3	5	5	4	4	4	1	4	5	4	5	5	5	4	4	2
2	5	4	5	3	5	5	5	2	4	5	5	3	5	2	3	5	4	4	3	5	4	5	4	2	4	4	3	5	4	5	4	5	5	4	5	5	4	4	5	5	5	5	4	5
1	4	4	4	4	4	2	4	4	4	3	3	4	4	2	3	3	4	4	3	4	3	4	4	3	4	4	4	4	3	4	4	5	4	4	3	4	4	4	2	4	4	4	3	3
1	4	1	5	4	4	3	4	2	5	5	3	4	5	3	4	4	5	4	3	4	5	5	3	2	4	5	3	4	1	4	5	4	4	5	3	4	3	4	5	5	5	4	4	5
1	5	2	5	5	5	5	3	3	5	5	3	3	5	4	3	3	3	4	3	5	5	5	4	5	5	4	3	4	4	4	5	3	5	5	2	5	3	4	4	4	1	5	2	1
1	3	3	4	3	3	4	4	3	4	3	2	4	4	3	3	4	4	3	3	4	3	4	3	3	3	4	4	5	3	3	4	3	4	4	4	3	4	4	4	4	2	4	3	1
2	3	5	5	5	3	2	4	5	2	3	3	5	5	3	1	3	5	5	3	1	3	5	5	3	2	3	5	5	3	5	5	5	5	4	3	3	5	4	3	4	4	4	4	1
1	5	2	4	4	4	2	4	4	4	4	3	2	4	2	3	3	4	4	4	4	4	4	2	4	4	4	4	4	2	4	2	2	4	4	5	4	2	4	4	5	5	3	4	4
2	5	3	5	4	2	3	5	4	1	2	5	4	5	2	4	4	5	5	2	1	4	5	4	4	2	4	4	5	2	2	4	5	5	2	2	4	4	4	2	3	1	5	2	1
2	4	4	2	4	4	4	4	2	4	4	4	4	4	4	2	4	4	4	4	4	4	4	4	4	2	4	4	4	4	2	4	4	4	4	4	4	4	4	4	4	2	4	2	2
1	5	2	4	4	4	3	4	2	4	5	4	5	5	2	4	4	4	4	2	4	4	4	5	4	4	4	3	4	2	5	2	5	4	4	5	4	3	4	3	5	5	4	2	4
1	5	4	5	5	4	2	4	5	5	4	3	5	3	4	3	2	4	5	4	4	4	4	4	5	4	4	4	4	4	3	5	4	4	5	3	5	5	5	1	4	2	4	1	3
1	3	2	4	4	4	2	4	2	2	4	5	4	5	2	2	2	4	2	1	4	4	3	5	4	4	2	4	4	3	4	2	4	4	2	2	2	2	4	1	5	2	4	3	1
2	1	3	4	5	4	3	5	5	3	3	4	4	5	2	2	4	3	5	1	4	4	4	5	3	3	4	3	5	3	4	3	5	5	4	5	4	3	5	3	4	3	5	5	2
1	3	3	5	5	4	2	4	5	4	4	4	5	5	4	3	3	3	5	3	4	3	4	4	5	4	4	5	5	5	5	4	5	5	4	4	3	5	5	5	4	5	5	4	4
2	4	3	4	4	4	3	4	3	4	4	4	4	4	3	4	4	5	4	3	4	4	3	3	4	4	4	4	4	3	5	3	4	4	3	2	4	4	4	4	5	4	4	2	3
2	4	4	4	4	3	3	4	4	4	4	4	3	4	2	3	4	4	4	2	3	3	4	4	3	3	4	4	4	3	4	3	4	4	3	3	3	4	4	3	3	3	4	4	2
1	4	5	5	5	5	2	5	5	5	5	4	5	5	4	5	5	4	5	4	5	2	4	5	5	5	5	4	5	5	5	5	5	5	5	4	4	5	5	5	5	5	4	5	5
2	4	3	4	4	4	3	4	3	5	5	4	5	4	5	4	4	4	5	5	4	4	4	4	4	4	5	4	4	4	4	4	5	5	4	5	5	4	5	5	3	4	3	5	4
1	4	4	3	5	5	2	4	2	4	5	5	4	5	2	5	3	3	2	4	5	2	3	4	4	5	4	2	4	4	5	3	4	4	5	5	4	4	4	4	4	5	4	2	4
1	3	4	4	4	3	2	4	3	4	3	3	5	5	3	2	3	4	4	4	2	2	4	4	4	3	3	4	4	4	3	3	4	4	4	3	4	4	4	4	3	3	4	4	2
1	1	2	4	4	3	2	3	3	2	4	3	2	4	2	3	3	4	4	2	3	1	4	1	3	3	3	2	4	2	4	2	3	4	3	1	4	2	3	2	4	2	4	3	2
1	4	3	4	3	4	3	4	3	4	5	4	3	5	3	4	5	5	3	3	4	3	5	5	4	4	4	4	3	2	2	4	4	3	4	3	5	4	4	5	5	5	4	3	3
1	3	3	4	3	3	3	3	3	3	3	3	4	3	3	3	3	3	3	3	3	3	3	3	3	3	3	3	3	3	3	3	3	3	3	3	3	3	3	3	3	2	3	3	2
2	5	4	5	3	4	5	5	5	4	4	3	5	5	2	3	5	5	5	1	3	5	5	5	5	1	4	5	5	2	5	4	5	5	4	3	5	5	5	5	4	4	5	5	2
1	5	3	4	1	4	4	4	3	4	4	4	5	5	3	3	4	4	2	2	4	4	5	4	4	4	4	4	4	5	4	4	5	4	4	4	4	4	4	2	4	3	5	4	3
2	3	2	3	1	3	1	4	2	1	4	1	3	4	2	3	3	4	1	1	3	1	4	1	2	3	1	2	4	1	4	2	4	3	2	2	2	3	2	1	4	3	4	2	2
1	2	4	4	3	5	2	4	5	5	5	4	4	5	1	5	3	5	2	1	5	3	4	5	4	4	5	2	5	2	5	2	5	5	5	5	5	5	4	4	5	5	4	1	4
2	2	2	4	4	2	2	5	4	1	5	3	5	5	1	2	1	5	5	1	3	2	5	4	4	2	2	5	5	4	4	2	5	4	2	2	4	5	4	2	2	4	4	4	4
2	4	2	5	5	4	3	4	2	1	4	2	2	5	1	4	1	4	5	2	3	4	4	3	2	3	4	2	5	3	4	4	2	5	3	1	4	2	4	2	2	2	5	3	1
1	3	4	4	5	3	3	4	3	3	3	2	5	4	4	2	3	4	4	3	2	3	4	4	4	4	3	4	2	4	4	3	4	3	3	3	4	5	3	3	3	3	4	4	3
1	3	3	5	5	4	2	4	5	4	5	4	5	5	4	3	4	4	4	3	4	2	4	4	4	4	3	4	5	4	5	1	5	4	4	2	3	5	4	4	4	4	4	3	3
2	5	2	5	4	3	2	5	3	4	4	4	4	5	2	2	4	5	2	4	4	2	5	4	4	3	4	5	4	3	4	2	5	4	4	2	4	3	5	3	4	3	5	2	2
2	2	4	5	5	4	1	4	5	4	4	2	5	4	2	4	2	4	5	5	4	1	4	4	5	4	4	2	5	5	5	1	5	5	4	4	2	5	5	5	5	5	4	5	4
2	5	2	4	4	2	2	4	4	2	4	2	4	5	2	3	4	4	4	4	2	3	4	4	2	4	4	4	4	4	5	2	4	4	4	2	4	4	4	4	2	4	4	4	2
2	2	4	4	5	4	2	4	5	2	5	4	5	5	1	4	4	4	5	2	4	2	4	5	4	4	4	5	5	5	5	2	5	4	4	2	5	5	5	2	4	2	4	5	4
1	4	4	5	4	4	4	4	5	3	5	4	5	5	1	4	4	4	5	4	4	4	4	5	4	4	5	4	5	2	4	4	4	5	4	2	4	5	5	3	4	3	4	4	5
1	4	4	4	5	4	4	4	3	4	4	4	5	5	4	1	4	4	5	5	5	5	5	5	4	1	4	5	5	2	5	5	5	4	4	5	4	4	4	5	4	5	4	4	4
1	5	1	4	5	5	5	4	2	4	5	4	4	5	4	3	4	2	2	5	5	5	4	5	4	5	5	5	5	2	4	5	5	5	4	5	5	2	4	4	2	3	4	2	2
1	2	5	4	5	2	5	4	2	5	3	5	4	5	4	1	3	4	4	5	1	3	5	5	5	2	4	2	2	2	1	5	4	4	5	2	3	3	4	5	2	2	4	4	1
1	3	4	3	2	5	2	4	3	4	5	4	4	4	3	5	4	4	3	2	5	2	4	3	4	5	5	3	4	2	2	2	4	4	4	4	3	4	4	4	4	2	4	4	3
2	4	5	4	4	2	4	4	4	4	4	4	5	5	2	1	4	4	4	4	2	4	4	4	4	2	4	5	4	4		5	5	4	4	4	4	4	4	4	2	4	5	4	2
1	2	4	4	5	4	1	3	4	4	5	3	5	5	1	4	3	4	5	2	4	2	3	5	4	4	3	2	5	4	1	2	4	5	4	4	4	4	5	2	4	1	4	4	1
2	3	1	4	5	4	3	4	4	2	4	4	2	5	2	5	3	5	5	4	5	3	2	3	2	5	3	3	3	3	5	3	3	4	3	3	4	3	2	2	3	4	2	3	3
2	4	4	4	4	5	2	5	2	3	5	4	5	5	3	5	5	5	1	3	5	4	5	4	3	5	3	4	4	1	5	3	5	4	3	5	5	5	3	4	5	5	5	1	5
1	3	4	3	4	3	3	4	4	2	2	4	5	4	4	2	3	4	2	4	3	4	4	3	4	3	2	4	2	4	3	2	4	3	4	4	4	4	3	4	2	2	4	3	2
2	4	2	5	4	3	4	3	5	3	4	4	4	5	2	3	4	2	5	3	3	5	4	5	2	2	4	3	4	3	3	4	3	5	2	2	4	3	4	3	2	4	3	4	2
2	1	5	5	2	2	2	4	4	4	5	2	5	5	3	4	3	5	2	4	3	2	4	3	3	2	2	4	4	1	5	2	4	4	4	2	3	4	3	4	4	4	4	2	3
2	4	2	5	5	5	4	4	4	3	4	3	5	5	2	3	4	3	3	2	4	5	5	4	5	5	5	3	5	5	5	4	4	4	4	2	4	5	5	3	4	5	4	3	3
1	3	4	4	4	4	3	4	4	3	4	5	5	5	3	3	4	4	3	4	4	4	5	5	3	4	4	4	4	4	4	2	5	4	4	2	4	4	4	4	4	4	4	4	3
1	2	1	4	5	4	3	4	4	4	5	4	5	4	2	3	4	4	5	4	4	3	4	4	4	4	3	4	5	5	4	2	4	4	4	5	5	5	4	4	4	3	4	4	2
1	2	3	5	5	4	3	4	5	5	5	4	5	5	5	5	3	4	5	5	5	2	4	4	5	5	5	5	5	4	4	3	5	5	5	3	4	5	5	5	4	4	4	5	5
1	2	3	4	5	5	4	5	3	5	5	1	5	3	4	5	3	3	4	5	5	3	4	3	5	5	2	4	5	4	2	4	4	3	5	5	4	5	5	5	5	5	5	2	1
1	4	3	4	5	4	4	4	5	4	4	5	5	5	3	2	4	4	4	5	3	4	4	4	5	3	4	5	4	5	3	5	4	4	4	4	5	2	5	5	4	2	4	5	2
1	2	5	5	4	4	1	4	5	3	5	3	5	5	3	5	2	5	5	4	4	1	5	4	5	5	3	3	5	2	4	2	5	5	5	5	1	5	4	3	5	2	5	5	3
1	4	5	4	4	4	4	4	3	4	4	4	5	5	4	3	4	5	2	4	4	4	5	4	5	3	4	4	5	4	5	4	4	2	4	4	4	4	4	5	3	5	5	4	4
2	5	4	4	3	3	5	3	4	3	3	4	5	5	1	3	4	4	5	4	3	5	5	4	4	2	4	5	4	2	3	5	5	4	4	3	4	5	4	4	4	3	4	4	3
2	4	5	5	2	4	2	4	2	2	5	3	5	5	1	3	2	4	4	2	4	1	4	4	5	4	4	2	5	2	5	4	4	5	5	5	4	4	5	4	5	5	4	5	4
1	5	1	5	5	5	5	5	5	4	5	5	5	5	3	5	5	4	5	5	5	5	5	5	4	5	5	4	5	5	5	5	4	5	4	4	5	4	5	5	5	5	4	1	4
2	3	2	3	5	4	2	4	2	4	5	2	5	5	4	4	3	5	4	4	5	3	4	3	5	4	3	2	4	5	4	2	4	5	4	3	4	3	4	5	4	4	4	3	4
1	4	4	4	4	4	2	4	4	4	4	4	5	5	2	3	3	4	4	2	4	2	5	5	4	4	4	4	4	4	3	2	5	4	4	4	4	4	4	3	4	3	4	4	3
1	3	4	4	5	4	2	4	4	4	3	2	5	4	2	3	2	4	4	5	4	2	4	3	4	4	3	4	4	2	4	4	4	4	4	2	3	5	4	4	4	4	4	4	4
1	4	2	4	4	4	3	3	3	4	5	4	3	5	2	4	4	3	4	2	4	4	5	5	3	4	4	3	5	3	4	2	3	4	4	4	2	3	5	4	5	4	2	4	2
2	3	4	5	3	3	3	5	4	2	5	3	5	5	1	3	3	4	5	1	4	3	5	4	1	4	3	5	4	3	4	2	5	4	2	3	3	5	4	3	4	2	4	4	1
2	4	4	5	4	4	4	4	4	4	4	5	4	5	2	4	4	2	5	4	4	5	5	5	4	4	4	5	5	2	4	4	4	5	4	2	5	2	5	4	4	2	5	5	1
1	4	3	4	5	4	2	4	5	2	5	4	5	5	2	4	3	4	4	4	5	4	5	4	4	5	4	2	5	4	5	2	5	4	4	3	4	5	5	3	5	5	5	3	4
1	2	4	4	4	4	2	4	4	4	4	3	4	5	4	3	3	4	5	2	4	2	5	4	5	4	2	4	4	2	3	2	4	5	4	5	2	5	5	4	4	1	5	4	1
2	5	2	4	1	2	2	5	5	1	4	2	5	5	2	2	2	5	4	1	2	2	5	5	2	2	2	5	4	2	4	2	5	4	2	2	4	5	4	4	2	2	4	4	1
1	4	4	5	5	4	2	5	2	2	4	5	5	5	1	2	5	5	4	2	4	5	5	5	4	2	4	2	5	3	2	2	5	5	2	2	4	1	5	3	2	4	4	4	2
1	4	3	4	5	3	3	4	2	4	4	5	3	4	5	2	4	3	4	4	4	2	1	5	4	3	3	4	4	3	2	2	4	4	4	4	4	4	4	5	4	2	4	4	2
1	2	3	4	3	4	2	3	3	4	5	3	4	4	3	4	3	3	3	4	4	2	4	4	4	4	3	4	4	3	5	2	4	4	4	4	3	4	4	3	4	4	3	3	4
2	4	2	3	2	3	4	4	2	2	2	2	3	4	2	2	3	2	2	2	2	3	2	3	2	3	3	2	2	3	2	4	4	2	2	4	4	3	4	2	2	2	4	2	1
2	5	2	5	3	4	4	5	4	2	3	4	5	5	2	1	5	4	4	2	3	4	5	4	3	2	5	5	3	3	4	2	5	5	2	4	5	5	5	4	3	2	5	2	2
2	4	4	4	4	3	2	4	5	4	4	4	4	4	4	4	3	4	5	2	3	2	4	5	4	3	3	5	4	2	4	2	4	4	4	2	3	4	4	2	3	3	4	5	2
1	4	4	2	5	2	5	5	1	5	4	5	5	5	2	4	1	5	4	5	5	5	5	2	5	5	5	5	4	5	4	5	5	4	4	1	5	4	4	2	4	4	5	4	2
1	3	4	5	5	4	2	4	4	5	5	4	5	5	4	4	4	5	5	5	4	2	5	5	5	4	3	5	5	5	4	2	5	5	5	2	4	5	5	5	4	4	5	4	3
2	2	4	5	4	2	1	5	5	5	2	4	4	5	4	1	1	5	4	4	2	2	5	4	5	2	3	5	5	4	3	2	5	5	5	1	4	5	5	4	5	3	5	1	1
2	5	5	5	3	4	4	5	5	3	5	4	5	5	1	5	4	4	5	2	4	5	4	4	3	5	5	5	4	4	5	5	5	5	4	2	5	5	4	2	5	2	5	5	2
1	3	5	5	5	3	2	5	3	4	5	4	5	5	3	4	5	5	1	4	5	2	5	4	4	4	2	5	5	5	4	1	5	3	4	2	2	5	4	4	4	2	5	2	2
2	2	5	5	5	2	1	5	5	4	5	4	5	5	1	2	3	4	2	2	2	1	5	5	4	4	1	4	4	5	5	2	5	2	4	1	2	5	4	4	2	4	5	5	2
1	3	2	4	3	4	3	4	4	2	5	4	4	5	2	4	3	3	3	2	4	4	4	4	3	4	5	3	5	3	3	4	2	3	2	4	4	3	3	2	3	2	3	2	2
1	4	2	4	5	5	2	3	3	5	5	4	3	4	3	4	4	2	3	3	4	4	3	3	5	5	5	2	5	3	4	5	3	3	5	5	3	3	4	4	5	1	3	4	2
2	5	2	5	5	5	5	3	5	3	3	4	5	5	4	2	3	3	4	2	3	5	5	5	4	5	5	4	5	5	3	4	4	5	4	2	4	4	5	4	3	4	4	4	3
1	4	2	4	4	2	2	4	2	5	2	4	4	5	3	4	2	3	4	4	2	2	4	5	4	2	2	4	5	3	2	2	4	4	4	2	4	3	5	4	2	4	3	4	2
1	4	3	5	5	4	3	5	5	5	4	5	4	5	3	3	4	5	5	4	4	3	4	5	5	5	4	3	5	4	5	2	5	5	5	3	4	5	5	5	4	5	5	4	3
2	4	4	5	1	5	2	4	2	1	5	4	5	5	1	4	4	2	1	1	5	2	4	5	2	5	4	4	5	1	5	2	4	2	4	5	2	5	4	2	4	5	4	4	4
1	5	2	5	4	5	2	5	5	5	5	5	4	5	2	5	4	4	5	2	5	2	5	5	4	5	5	5	5	2	5	5	5	5	4	4	5	4	5	5	5	4	4	4	1
1	5	2	5	5	4	4	4	4	2	2	2	4	5	2	1	4	4	5	2	2	4	4	3	4	2	4	4	4	4	1	4	4	4	4	4	4	4	4	4	4	1	4	4	1
1	2	3	3		4	2	4	2	3	5	4	5	4	2	4	2	4	2	2	5	2	4	4		3	1	2	3	2	2	2	4	3	3	4	1	5	4	4	5	2	4	3	1
1	2	4	4	5	4	2	4	5	5	5	3	5	5	3	4	2	4	4	5	4	1	5	4	5	4	3	2	4	5	3	2	4	5	5	2	2	4	4	5	4	4	4	5	2
2	4	2	5	5	4	2	4	4	4	4	4	5	5	4	2	3	4	4	2	3	2	4	5	5	4	2	4	4	4	2	2	4	4	4	2	2	4	4	2	2	2	4	2	1
1	1	4	2	2	4	2	4	4	4	4	2	5	4	2	4	2	4	2	2	4	1	4	2	4	4	2	3	2	3	4	2	4	4	4	2	2	5	2	2	4	4	4	2	4
1	4	5	5	5	5	5	5	5	4	4	5	5	5	2	5	5	5	5	5	5	4	5	5	5	4	5	5	5	5	4	5	5	5	5	4	5	5	5	5	5	2	5	4	3
1	5	4	2	5	4	4	4	4	5	4	4	5	5	4	4	4	4	4	5	4	4	4	5	5	4	4	4	4	5	4	4	4	4	5	2	4	3	4	5	4	3	4	4	3
2	3	2	5	4	3	1	4	4	3	5	3	5	5	2	4	3	2	5	4	4	1	3	4	4	3	3	4	4	4	5	2	4	5	4	3	3	4	4	3	4	4	4	4	4
2	4	1	4	5	3	3	5	3	3	2	4	5	5	3	1	5	5	3	1	3	2	5	2	5	4	3	5	4	5	1	2	5	5	5	1	5	5	5	2	1	1	5	3	1
1	2	4	5	2	4	2	4	4	2	4	5	5	5	2	4	3	4	4	2	2	2	4	4	4	4	2	4	4	4	3	2	4	4	4	2	3	4	4	4	4	2	4	4	1
1	4	4	4	5	2	1	5	4	2	4	5	5	5	4	1	4	5	2	2	4	2	5	4	4	2	2	5	4	2	4	2	5	2	2	4	4	5	4	4	4	4	4	2	2
1	4	4	5	5	3	3	4	4	4	4	4	4	5	4	2	3	4	5	5	3	3	4	5	4	2	3	4	4	4	4	4	4	4	4	3	4	4	4	5	3	3	4	4	2
2	4	2	4	5	4	2	5	4	4	5	5	5	5	5	3	5	5	5	3	4	4	5	5	5	4	5	4	4	2	4	2	5	5	4	4	5	4	5	5	4	4	5	3	3
1	3	3	4	3	4	3	5	2	3	3	3	3	5	4	1	3	4	3	3	2	3	5	4	3	3	4	3	3	3	1	2	5	4	3	3	3	3	3	3	3	4	4	3	1
1	4	3	4	5	4	4	5	4	4	5	4	5	5	3	4	4	4	4	5	4	4	5	4	5	4	3	5	4	4	5	5	5	4	5	3	5	5	4	5	4	5	5	3	4
1	2	3	4	4	3	2	4	3	4	4	4	5	5	3	2	2	4	4	3	3	2	4	4	4	3	2	3	4	2	2	2	4	4	3	3	3	3	4	3	3	2	4	3	1
1	2	5	5	5	4	3	4	4	4	5	4	5	5	3	2	3	4	5	3	2	1	4	5	4	3	4	4	4	3	1	2	4	5	5	2	1	5	4	5	2	2	4	4	1
2	3	5	5	5	5	3	5	5	5	5	5	5	5	5	3	4	5	5	5	4	3	5	5	5	5	3	5	5	5	3	5	5	5	5	2	4	5	5	5	4	2	5	5	3
1	3	3	4	3	4	2	4	4	4	4	4	5	5	3	4	3	4	3	2	3	2	5	4	4	2	3	3	4	3	4	2	4	4	4	4	4	4	4	4	3	3	4	4	2
1	4	2	5	2	4	4	4	5	4	4	4	4	5	2	4	4	3	5	2	5	2	4	4	5	4	5	3	5	2	5	3	4	5	4	1	4	2	5	5	4	2	4	5	1
1	3	2	4	4	4	3	3	3	3	4	3	4	4	4	2	3	2	4	4	3	3	4	3	2	3	4	2	3	2	4	2	3	4	4	4	3	3	4	3	4	4	4	3	1
1	2	1	1	5	4	3	1	5	5	5	1	1	1	5	5	1	1	5	5	1	4	1	3	5	5	3	1	1	5	1	5	1	5	5	5	3	1	5	5	1	1	1	5	1
1	4	1	3	3	4	3	4	5	4	4	4	4	4	2	4	4	4	2	3	3	2	5	2	3	4	4	2	3	2	1	3	4	3	3	4	4	4	3	4	3	1	4	2	1
1	4	2	4	5	4	2	4	4	4	4	4	5	5	2	2	4	4	4	4	4	4	4	4	4	2	4	4	4	4	4	2	4	4	4	4	4	4	4	4	2	4	4	4	4
1	2	4	4	2	4	3	4	4	4	5	3	5	5	3	3	3	5	4	3	4	2	4	4	4	4	4	4	4	3	4	2	5	4	4	3	2	5	4	4	4	3	5	4	1
1	4	4	5	5	5	2	5	1	4	5	3	5	5	2	4	3	5	2	5	4	2	4	5	4	4	4	4	5	4	4	5	5	4	4	2	5	5	5	5	5	5	5	5	5
1	4	3	4	5	4	2	4	3	5	4	5	5	5	2	4	5	5	5	2	5	2	4	4	4	5	3	5	4	4	5	2	5	4	4	4	4	4	5	3	3	4	4	3	3
1	4	3	4	4	4	4	4	2	4	4	3	5	4	2	3	4	4	2	2	4	4	4	4	4		4	5	4	4	4	2	4	4	4	4	4	4	4	4	4	2	4	2	2
2	4	3	4	5	2	3	4	4	4	4	2	4	5	4	2	4	4	5	4	3	3	3	3	4	4	3	5	5	3	4	3	5	4	3	4	3	4	5	5	2	3	5	2	3
1
2	2	4	4	4	1	1	5	4	4	4	2	5	5	4	2	2	5	2	2	2	2	4	4	5	1	2	4	4	4	2	2	5	4	4	4	2	4	4	5	2	1	5	5	1
1	2	4	4	2	4	3	4	2	2	4	3	4	4	2	4	2	4	2	1	4	2	4	2	4	4	2	4	4	2	4	2	4	2	4	4	2	4	3	2	4	3	4	2	4
2	4	4	5	5	4	2	4	3	4	4	3	5	5	2	4	4	5	4	4	4	4	5	4	5	4	3	5	5	5	3	2	5	5	4	3	4	5	4	4	4	4	5	4	3
1	4	2	4	4	4	4	4	4	2	5	4	4	5	1	4	4	4	4	2	5	4	5	4	3	4	4	4	4	4	5	4	4	4	2	5	5	3	4	3	4	5	5	2	5
1	3	2	5	5	3	5	4	4	1	3	5	4	5	2	2	4	1	5	2	3	5	3	5	3	2	5	3	3	2	2	5	3	4	5	5	5	2	5	5	2	2	3	5	1
1	2	2	5	5	4	2	4	5	3	4	3	5	5	1	4	4	3	5	2	4	2	5	5	3	4	2	3	5	2	5	1	5	5	4	3	3	4	5	1	5	5	4	2	2
1	2	3	4	4	4	4	3	4	4	4	4	4	5	2	4	3	3	4	4	4	1	4	5	4	4	4	2	4	3	3	2	3	4	4	4	2	2	4	4	4	2	4	4	1
2	4	5	4	3	4	3	5	4	4	5	4	5	5	3	4	4	4	4	3	4	4	4	4	5	3	3	5	4	3	4	3	4	3	4	5	3	5	5	5	4	3	3	4	3
2	5	4	4	3	4	4	5	4	5	4	4	5	5	4	4	4	5	4	2	5	3	4	5	5	5	3	4	5	3	5	4	5	5	5	4	3	5	4	4	5	5	5	5	4
1	4	2	5	2	5	4	4	2	4	5	2	4	5	1	4	4	4	1	1	5	4	4	4	2	5	5	2	4	2	5	2	4	2	4	5	2	4	4	2	5	5	4	1	5
1	5	2	2	4	2	4	4	5	2	5	4	5	4	1	2	3	2	4	2	5	4	2	4	4	2	4	4	4	1	3	2	5	4	3	4	4	4	3	2	4	2	4	3	2
1	3	4	5	4	4	3	5	5	2	4	4	5	5	2	3	3	4	5	2	4	3	5	5	2	4	4	4	5	3	3	3	5	5	3	3	4	3	4	2	3	3	5	5	2
1	1	2	5	4	4	1	4	4	4	4	2	5	5	2	3	2	4	4	4	4	1	4	2	2	4	2	4	4	1	4	1	5	4	4	4	2	2	4	4	5	4	4	4	2
2	4	5	4	4	4	3	5	5	5	4	5	5	5	4	4	3	5	4	5	1	4	5	4	1	4	3	4	4	5	3	2	5	5	5	2	4	5	5	3	4	5	5	5	3
2	4	2	4	5	4	2	5	2	4	5	2	5	5	2	3	3	4	4	4	1	2	4	2	5	4	3	5	4	1	5	2	5	5	4	4	4	5	4	4	2	5	5	2	4
1	4	2	4	4	5	4	4	5	3	4	4	4	5	4	4	4	4	5	3	4	4	4	5	4	4	4	5	5	4	4	5	5	4	3	4	5	5	4	4	4	4	5	4	4
1	5	3	5	4	4	4	5	2	2	5	4	5	5	1	5	3	5	5	3	5	4	5	5	5	5	5	5	5	5	3	5	5	5	2	4	5	5	5	2	4	3	4	2	5
1	4	4	4	5	5	2	4	3		5	3	4	5	4	5	5	5	2	5	5	4	4	4	4	5	4	4	4	5	4	5	4	4	4	5	4	2	3	5	5	4	4	2	4
1	2	2	5	4	2	1	4	5	3	2	5	5	5	1	2	4	5	5	2	2	1	5	5	2	2	1	2	5	2	4	1	5	5	2	1	2	5	5	1	2	2	5	4	3
1	2	5	4	4	4	1	4	3	4	4	4	5	4	2	4	3	5	2	4	3	2	4	4	4	4	4	2	4	3	5	2	3	4	5	4	3	3	4	4	4	4	4	5	5
1	4	3	4	4	4	4	3	2	2	5	4	3	4	2	4	3	3	4	3	4	4	4	5	3	4	4	3	4	3	4	4	3	4	4	4	4	3	4	3	4	4	3	4	3
2	4	2	4	4	4	5	4	4	3	5	4	3	5	2	3	3	1	4	1	4	5	2	5	2	4	5	4	5	2	5	5	3	4	4	4	4	3	5	3	4	4	3	4	4
1	3	4	4	2	4	2	3	4	3	4	4	4	4	2	4	3	4	5	2	4	2	4	4	2	4	4	5	4	2	4	4	4	4	3	2	2	4	4	4	4	4	4	4	4
1	4	2	4	3	4	4	3	4	3	5	4	2	4	2	3	3	3	5	3	5	4	5	4	3	4	4	4	4	2	4	5	3	5	3	5	4	3	4	2	4	2	4	5	1
2	4	3	4	5	3	2	4	5	2	4	2	5	4	4	4	4	4	4	2	4	4	4	5	4	2	4	5	4	5	4	4	4	4	4	4	4	5	4	3	4	2	4	4	4
2	2	2	3	4	4	2	2	5	4	5	3	4	5	3	4	2	1	5	4	4	2	2	4	5	4	4	2	4	4	5	4	4	3	4	4	3	3	4	4	4	5	4	3	3
1	3	4	4	4	4	3	4	3	4	4	4	4	4	4	4	4	4	3	4	4	3	4	4	4	4	4	4	4	4	4	4	4	4	4	4	4	4	4	4	4	4	4	2	3
1	5	1	4	2	5	5	5	4	2	5	2	1	5	1	4	5	2	2	2	5	5	5	4	3	5	5	2	4	1	5	5	4	4	4	2	5	2	5	2	5	4	3	2	2
1	4	2	5	5	4	4	4	5	5	4	5	5	5	2	4	4	4	5	4	5	4	4	5	5	4	4	4	5	2	4	2	5	4	5	4	4	4	4	5	5	5	5	4	1
2	1	2	5	1	5	1	5	5	4	4	2	4	5	2	4	2	4	2	2	2	1	5	2	4	5	1	2	4	2	4	1	5	5	4	2	1	4	5	2	4	5	5	5	4
2	4	2	5	4	5	4	5	5	2	5	5	2	5	2	4	5	2	2	2	5	4	5	4	2	4	5	2	5	4	4	4	5	2	2	4	5	2	5	4	5	4	5	1	4
1	5	2	5	4	4	4	2	2	4	5	2	5	5	2	2	4	4	4	4	5	4	4	4	4	4	5	4	5	2	4	2	5	4	4	1	4	2	5	4	4	2	4	2	1
2	3	4	4	5	3	4	4	4	3	5	3	5	4	3	2	3	4	4	4	3	4	4	5	4	4	3	4	4	4	5	4	4	3	4	5	4	4	4	5	4	5	4	4	4
1	2	2	4	2	2	2	4	2	2	4	2	4	4	2	4	2	4	2	2	4	2	4	2	2	4	2	2	4	2	2	2	4	2	2	2	2	4	2	2	2	2	4	2	2
1	1	4	5	2	3	2	4	3	2	5	4	5	5	2	3	2	5	3	3	3	1	5	5	4	4	2	4	4	2	3	2	5	4	3	4	3	5	3	4	4	2	5	4	1
2	5	4	5	5	3	4	5	2	4	2	4	5	5	2	4	4	4	5	1	4	4	5	4	4	3	4	5	4	5	4	4	5	5	2	3	5	5	4	1	4	3	5	3	2
2	5	2	4	4	5	5	4	4	2	5	4	4	4	2	4	4	4	3	4	5	5	4	2	4	4	4	3	5	4	4	4	4	3	4	5	4	3	4	5	4	4	4	3	3
1	2	2	5	4	4	2	5	5	5	4	4	5	5	4	4	4	5	5	4	4	2	5	5	5	4	4	5	4	4	4	4	5	5	5	2	4	5	5	4	4	4	4	5	2
2	2	5	5	5	4	2	4	5	2	4	2	5	5	2	4	4	5	5	4	4	2	5	5	4	4	2	5	5	4	4	2	5	5	4	2	4	5	5	2	4	4	5	4	2
1	2	5	5	5	4	2	4	3	5	4	3	5	5	4	3	3	4	4	4	3	2	4	5	5	3	2	4	4	5	3	3	4	4	5	4	3	5	5	3	3	4	5	4	2
1	3	4	3	3	4	3	4	2	4	4	4	4	4	4	4	5	5	2	4	5	2	3	4	4	4	3	3	3	2	4	2	4	4	4	4	3	3	3	2	4	2	4	3	4
1	2	2	5	4	4	1	2	4	4	5	4	5	5	4	2	2	4	5	2	4	1	4	5	4	4	4	2	5	2	4	1	2	4	4	4	2	4	5	4	5	2	4	4	2
1	4	5	4	5	4	5	4	5	3	5	2	5	5	4	4	4	5	5	5	4	4	4	5	4	4	5	5	4	5	4	3	4	4	3	4	4	5	5	5	4	5	4	5	2
1	1	3	4	5	3	2	4	5	3	3	3	5	5	4	2	2	4	5	3	3	1	4	5	5	4	3	5	4	5	3	4	4	4	3	2	2	5	5	3	4	3	5	4	2
2	4	4	5	2	4	4	5	5	1	4	3	3	5	1	5	4	5	5	1	4	3	5	5	4	4	4	5	5	2	5	4	5	5	3	2	4	4	5	1	4	5	5	4	3
1	2	4	4	4	4	2	3	4	3	4	2	5	5	2	4	3	4	5	3	4	2	4	4	4	4	4	4	5	2	4	2	4	5	4	4	2	5	4	3	4	4	4	4	3
2	2	4	5	4	4	2	4	4	4	5	3	4	5	3	4	3	2	4	4	5	2	1	4	4	3	4	4	5	3	4	4	5	5	4	4	2	4	5	4	4	2	4	4	2
1	4	4	4	3	5	2	4	2	4	5	4	4	5	2	4	3	5	2	2	5	2	4	2	4	5	4	2	4	2	5	2	4	2	4	5	5	2	2	4	5	5	4	2	4
1	5	4	4	4	4	3	4	4	4	4	5	4	5	2	4	4	5	5	4	4	4	4	4	4	3	4	5	4	2	5	2	5	5	4	4	4	4	4	4	4	2	4	2	2
1	3	3	4	3	4	2	4	3	3	4	4	4	4	3	3	4	3	3	4	3	3	4	3	4	4	4	2	5	3	3	4	4	4	4	4	3	4	5	3	3	4	3	3	3
1	3	4	4	5	3	2	5	4	4	5	2	5	4	3	4	3	4	5	4	4	3	4	4	4	2	3	5	4	4	4	5	5	3	4	4	4	5	4	3	4	2	5	4	4
1	4	2	4	5	4	3	4	3	4	4	4	4	5	3	4	4	4	4	4	4	4	5	5	4	4	4	5	4	3	4	4	3	4	4	4	4	3	4	4	3	3	4	3	3
1	3	4	5	3	3	3	5	4	2	5	4	5	5	2	3	3	5	4	1	3	2	5	5	4	3	4	5	5	4	4	3	5	5	4	3	5	5	4	3	3	5	5	4	3
1	4	4	5	5	2	3	4	4	3	4	3	4	4	3	2	3	4	4	4	3	4	4	4	4	2	3	3	4	3	3	3	4	4	4	2	3	4	4	4	2	2	4	4	2
1	4	4	5	5	4	3	4	4	3	5	5	5	4	2	4	4	4	4	3	4	4	4	5	4	4	4	5	4	3	2	4	4	5	3	4	4	4	4	4	4	2	4	4	1
1	1	3	4	5	3	1	5	5	5	5	4	5	5	5	4	1	5	4	5	3	1	5	4	5	4	1	3	4	3	5	5	5	4	5	3	3	5	4	4	3	5	5	4	4
1	2	2	4	3	2	2	4	4	4	4	4	4	4	2	4	2	4	4	2	2	2	5	5	4	2	2	2	4	2	2	2	4	4	4	2	2	4	4	2	4	4	4	4	1
1	5	2	4	5	3	3	4	3	3	3	2	4	4	2	4	4	4	4	1	4	3	4	4	4	3	4	4	3	4	4	2	4	4	4	2	4	3	4	3	4	4	4	2	4
2	2	5	5	4	4	1	5	4	4	5	1	5	5	4	4	4	5	2	2	4	2	5	2	5	4	2	5	4	4	5	2	5	4	4	4	4	5	4	4	4	5	5	4	4
2	4	4	5	5	4	2	5	5	2	5	4	5	5	1	4	5	5	4	2	4	4	5	5	5	4	4	5	5	5	5	4	5	4	5	3	5	5	5	5	2	5	5	5	4
2	2	2	4	4	2	2	4	4	4	4	4	4	4	2	4	2	5	4	2	4	4	4	2	4	2	2	4	4	2	4	2	4	4	4	4	2	2	4	4	4	4	4	4	1
2	3	5	4	5	5	3	4	2	3	5	4	5	5	3	5	5	5	4	3	4	2	2	4	5	4	3	2	5	4	5	3	4	5	5	1	4	5	5	3	5	5	5	4	5
1	4	2	4	5	4	2	4	2	2	5		4	5	1	3	2	5	2	4	4	5	5	2	2	4	2	4	2	2	5	2	4	2	2	5	5	4	4	4	4	4	4	2	2
1	1	4	5	3	5	2	4	4	3	5	4	5	5	1	5	4	4	4	2	5	2	3	4	5	5	5	1	5	2	5	2	4	4	4	4	3	4	4	4	5	5	5	4	4
1	2	4	4	5	5	2	4	5	4	5	3	5	5	2	4	3	4	4	4	5	2	3	4	4	5	2	5	5	4	4	4	4	4	4	4	2	5	4	2	4	4	4	4	4
1	3	2	3	4	4	3	4	4	4	4	4	5	4	2	4	3	4	4	2	4	3	4	4	4	4	3	2	2	3	2	3	3	4	4	4	3	4	3	4	4	2	4	2	2
1	3	3	2	2	2	2	2	2	2	4	3	4	4	2	3	3	2	4	2	4	3	2	4	3	3	4	2	2	2	3	2	2	4	3	4	3	2	2	2	2	2	3	2	2
1	2	4	3	5	4	2	4	4	5	4	4	5	5	4	3	3	5	2	4	4	2	5	4	5	3	2	4	4	5	5	2	5	4	5	4	3	4	4	5	4	4	4	4	4
1	4	2	5	5	3	2	5	5	4	4	5	5	5	3	3	5	4	5	3	4	4	5	5	4	2	5	5	5	3	3	5	5	5	4	4	5	5	5	3	3	2	5	5	2
2	5	2	4	5	4	5	4	5	5	2	4	5	5	5	4	4	4	5	5	1	5	4	3	5	2	4	3	4	5	4	5	4	4	4	4	4	5	5	5	4	2	4	4	4
2	2	3	5	5	5	2	5	4	5	5	3	4	5	4	5	3	4	4	5	5	2	3	3	5	5	2	5	4	3	5	2	5	4	5	4	3	5	4	5	5	5	5	4	5
1	4	2	4	4	4	2	4	2	4	5	2	5	5	1	4	4	4	2	4	5	1	4	4	4	4	2	3	5	2	4	2	5	5	5	2	2	4	4	3	4	5	4	2	1
1	1	3	2	3	3	2	2	3	4	3	3	3	1	4	3	3	4	4	4	2	4	5	3	3	3	3	3	3	5	3	4	2	3	3	3	4	3	4	3	4	3	4	3	3
2	4	4	4	4	5	4	4	2	4	5	4	4	5	3	4	4	4	2	4	5	4	4	4	4	5	4	4	4	3	5	4	4	2	4	5	4	3	4	5	4	5	4	5	5
1	2	4	4	5	4	4	3	4	2	4	5	5	5	2	4	4	5	5	2	5	4	4	4	2	3	4	2	4	2	4	2	4	5	2	3	5	5	5	3	4	4	5	3	3
2	2	4	2	4	4	4	2	2	2	5	2	4	2	4	4	4	2	2	2	4	2	2	2	2	4	2	2	2	1	5	2	5	2	2	2	4	5	2	3	4	5	2	2	2
2	4	4	3	5	4	5	4	2	3	4	4	4	5	2	3	4	4	4	5	4	5	5	5	4	4	3	5	3	2	4	2	4	4	4	4	3	4	4	3	4	4	4	2	3
2	4	4	4	5	4	4	5	2	5	4	4	5	4	4	4	4	5	2	5	4	2	5	2	5	3	2	5	2	5	4	2	5	4	4	2	4	5	2	5	5	4	5	4	4
1	2	4	4	3	4	2	4	2	3	4	2	5	4	3	2	2	5	2	3	2	2	5	3	4	3	4	2	4	2	3	2	4	3	4	2	2	5	4	5	3	2	4	3	2
2	2	4	4	4	4	4	4	4	4	4	2	5	4	4	4	3	4	4	4	4	2	4	2	4	4	2	4	4	4	4	4	4	4	4	4	3	4	4	4	4	4	4	4	4
1	4	3	1	2	4	4	5	1	1	5	1	3	1	2	4	3	5	1	1	5	4	5	1	3	4	4	5	1	2	3	2	5	1	1	5	4	5	1	3	5	4	2	1	3
2	5	4	4	2	4	4	4	4	1	5	4	5	5	2	4	4	5	4	2	4	4	5	4	2	4	4	5	4	3	4	4	4	4	3	4	5	5	4	2	4	4	4	3	3
2	3	2	5	5	5	4	4	4	3	5	5	5	5	2	4	5	2	5	2	5	4	3	5	3	5	5	5	5	5	4	4	5	5	3	5	4	5	5	2	4	5	3	5	4
2	5	2	5	4	3	4	4	3	2	4	4	5	5	3	3	3	4	5	4	3	4	4	5	4	4	4	5	5	3	2	4	4	4	2	2	5	5	5	5	4	2	2	4	2
2	4	2	5	4	4	2	3	4	2	4	2	4	4	2	3	2	4	4	1	4	2	2	4	2	4	2	4	4	3	4	2	4	4	4	3	2	4	4	4	3	4	4	4	3
1	4	2	5	4	5	2	5	5	4	5	4	5	5	1	5	4	4	5	5	5	2	5	5	4	5	4	2	5	2	4	2	5	5	4	5	4	5	4	5	4	4	4	5	2
2	4	2	5	3	5	2	4	5	4	5	4	5	5	1	4	4	2	5	2	4	4	4	4	3	4	4	2	5	3	5	4	4	5	4	5	4	3	5	5	4	5	5	5	4
2	5	4	4	4	4	5	4	4	3	5	4	4	5	4	1	5	4	5	4	4	5	5	5	3	4	5	5	5	4	4	5	4	4	4	3	5	4	5	4	2	3	4	3	1
1	4	4	5	5	4	5	5	5	5	4	4	5	5	4	4	4	5	5	5	4	5	5	5	5	4	4	5	5	5	2	5	5	5	5	5	4	5	5	5	4	2	5	5	1
1	5	5	5	5	5	2	4	2	5	5	5	5	5	2	5	5	5	5	1	5	5	5	2	5	5	4	5	5	5	5	4	5	5	5	5	5	5	5	5	5	5	5	2	5
1	3	3	4	5	4	2	4	3	4	3	4	5	4	2	4	3	4	3	3	4	4	4	5	4	4	4	3	4	4	4	3	4	4	3	4	4	4	4	3	4	3	4	2	3
1	4	2	5	2	4	4	4	4	1	5	4	2	5	1	5	4	4	5	1	5	4	4	4	4	4	4	2	5	1	3	3	4	5	1	2	4	1	5	2	4	2	4	5	3
2	1	5	4	2	4	4	5	2	1	5	3	5	5	2	4	5	5	2	1	5	2	5	5	4	3	4	5	5	2	5	2	4	4	4	5	5	2	5	2	5	4	5	3	3
1	4	3	4	5	4	2	5	3	4	4	5	3	5	2	2	5	5	4	2	3	5	5	5	4	3	1	5	5	2	4	2	5	4	2	5	5	5	4	2	5	4	5	3	4
1	3	2	4	4	3	2	2	3	2	4	3	5	5	2	3	1	4	4	2	5	1	4	3	3	3	2	2	4	1	5	2	4	4	3	3	2	5	3	2	3	5	4	2	4
2	4	4	4	5	4	5	5	2	4	4	4	5	4	3	3	4	5	4	4	4	5	5	5	4	4	4	5	4	4	5	5	5	4	4	5	5	4	4	4	4	4	5	2	3
2	3	3	3	5	5		5	3	5	5	5	5	5	3	4	4	5	2	5	5	1	5	5	5	5	4	4	4	4	5	1	5	4	5	5	2	5	4	5	5	5	5	2	5
1	5	4	4	4	4	4	4	4	4	4	4	4	5	2	3	4	4	4	2	4	4	4	5	5	4	4	4	4	4	3	5	5	4	4	4	5	5	4	2	4	4	4	5	3
2	4	3	4	3	4	3	4	5	3	4	4	5	5	3	4	4	4	4	3	4	4	4	4	3	4	4	5	4	3	4	3	4	4	3	2	3	5	4	3	4	4	4	4	3
2	4	4	4	5	4	4	5	2	2	2	3	5	5	2	2	4	4	3	4	4	5	5	3	3	4	5	5	4	3	2	5	5	4	2	2	4	5	4	2	4	2	4	2	1
2	3	3	4	4	5	2	5	5	4	5	4	5	5	4	5	3	5	5	4	5	2	4	5	4	5	4	3	4	5	5	4	5	5	4	3	3	4	5	4	5	5	5	5	5
2	2	4	4	2	4	2	4	2	2	3	2	5	5	1	4	4	5	4	4	2	2	5	4	4	4	4	2	4	2	4	2	5	5	4	4	4	2	5	3	4	4	5	5	2
2	2	3	5	4	4	2	5	4	2	4	3	4	5	2	2	3	5	5	1	4	2	5	4	4	3	4	4	5	2	3	3	5	5	4	1	4	5	5	2	4	3	5	4	2
2	4	4	4	2	4	4	4	2	1	5	2	4	4	1	3	3	4	4	1	4	1	2	2	2	4	4	2	5	1	5	2	4	4	1	1	5	2	4	2	5	5	4	2	5
2	2	1	5	1	4	2	4	2	4	5	4	4	5	4	4	4	4	4	5	5	2	4	5	4	5	4	3	5	4	5	3	4	4	4	4	4	4	4	5	5	5	4	4	2
2	2	3	4	4	3	2	4	5	4	4	2	5	5	3	2	3	4	4	2	2	2	4	5	3	2	2	4	4	4	5	3	5	5	3	2	2	5	4	3	2	4	5	4	3
2	4	4	5	5	5	4	5	5	5	5	5	5	5	5	2	4	5	5	5	4	4	4	4	5	5	5	4	5	5	5	4	5	5	5	4	5	5	5	5	5	4	5	4	4
2	4	2	4	4	2	2	4	4	4		4	5	4	4	3	2	5	4	5	4	2	4	4	5	2	2	5	2	4	3	4	4	4	4	1	4	4	4	4	2	2	4	4	2
2	2	4	5	2	2	1	4	4	3	5	2	5	5	2	3	1	4	5	2	2	1	2	5	4	3	1	4	5	4	4	1	4	4	2	4	1	5	4	2	4	4	4	4	4
2	3	3	4	5	3	2	4	4	5	4	4	5	5	3	3	2	4	4	4	2	2	4	4	4	3	3	4	5	4	4	2	4	4	4	3	2	4	4	2	3	4	4	4	3
2	4	4	4	2	3	3	4	2	2	4	2	5	5	2	3	3	4	2	2	3	4	4	2	2	2	3	4	4	2	4	4	4	4	2	4	4	4	4	2	4	4	4	2	2
2	5	4	4	5	2	5	4	2	3	5	4	5	4	2	2	3	4	4	4	3	4	5	2	4	2	4	4	4	5	5	3	4	4	3	4	4	4	4	4	4	4	4	3	3
2	4	3	5	3	2	2	4	2	1	5	2	5	5	2	3	3	4	5	2	4	2	3	5	2	3	3	4	4	2	4	2	5	4	1	4	4	4	5	1	4	2	5	2	2
1	2	5	4	5	3	2	4	3	4	4	2	5	4	4	3	2	4	4	4	2	2	4	3	4	3	3	4	4	4	4	3	4	4	4	2	4	5	4	3	3	2	4	3	2
2	5	2	5	2	4	4	4	5	2	4	2	5	5	2	4	4	2	5	2	4	4	4	4	2	4	4	2	4	2	4	4	4	4	2	4	4	4	4	2	4	4	4	5	4
2	3	5	5	5	4	3	4	5	5	5	4	5	5	3	3	4	5	5	5	4	3	5	4	5	5	4	5	5	5	5	5	5	5	5	4	5	5	5	5	4	5	5	5	5
2	4	5	5	4	4	4	4	5	2	5	4	5	5	4	4	4	5	5	2	4	4	4	5	5	4	4	5	4	5	4	4	5	4	4	4	4	5	4	4	4	5	5	5	5
2	5	2	4	5	3	5	5	5	1	2	4	4	5	5	2	4	5	4	4	3	5	5	5	4	1	2	5	4	2	5	4	5	4	1	2	5	4	5	5	4	5	5	4	3
2		5	5	5	3	2	5	4	4	4	4	5	5	2	1	3	4	5	4	3	1	5	5	5	4	2	5	5	2	3	2	5	5	4	2	2	5	5	5	2	2	5	5	1
2	4	4	3	2	3	3	3	4	4	5	3	5	5	4	3	3	4	4	4	4	4	4	4	4	3	3	5	3	1	5	4	4	4	4	4	2	3	2	4	3	5	3	3	4
2	4	4	4	5	5	5	5	5	2	4	5	5	1	2	4	5	5	4	2	5	4	4	5	4	4	2	5	2	5	5	4	5	4	4	4	5	5	4	4	5	5	5	2	4
2	3	4	3	4	4	3	4	2	4	5	3	5	4	2	4	3	5	2	3	5	2	4	3	4	4	4	4	4	4	5	2	5	3	4	5	4	4	4	3	5	5	5	2	4
2	4	4	5	5	4	4	4	4	4	4	4	4	5	2	3	4	4	5	3	3	4	4	5	4	4	4	4	5	4	4	4	4	4	4	3	4	4	5	3	4	2	4	4	4
2	5	2	5	5	5	2	4	2	3	5	4	4	5	2	4	4	4	4	2	5	4	4	5	5	5	4	5	4	3	5	2	5	4	3	5	4	4	4	2	5	5	5	2	5
2	5	5	3	2	5	2	5	2	1	5	1	5	2	2	3	4	5	1	1	5	2	4	4	1	4	4	5	1	1	5	2	5	2	4	3	4	5	2	1	5	5	4	1	3
2	3	4	4	2	3	1	3	4	3	4	3	5	5	2	5	3	2	4	3	4	2	2	3	4	3	2	2	5	2	5	2	4	4	3	2	2	5	5	3	5	3	4	4	4
2	3	4	5	4	3	4	4	5	4	4	2	5	5	2	2	4	5	4	5	2	2	5	5	5	4	5	4	5	2	4	4	5	4	5	3	4	4	5	5	2	4	4	4	1
2	5	2	5	4	4	4	4	5	1	5	4	2	5	2	4	5	4	5	2	4	5	4	5	2	4	4	4	4	2	4	4	4	4	2	4	4	4	4	2	4	4	5	4	4
2	5	2	5	5	5	2	5	2	4	5	5	5	5	2	5	5	5	4	2	5	2	5	4	4	4	4	4	5	4	5	3	4	5	4	1	4	5	5	2	4	4	5	4	4
2	5	5	4	1	5	5	5	4	1	5	1	5	3	2	5	3	5	4	2	4	4	4	4	2	4	4	5	3	5	5	5	4	2	3	3	5	5	3	3	5	5	5	3	5
2	5	2	5	4	4	5	4	5	3	5	3	5	5	1	4	4	3	4		4	3	2		2	4	4	4	5	2	5	4	5	4	4	4	4	4	5	4	4	5	5	4	3
2	4	4	4	4	2	2	4	4	2	5	2	5	5	2	5	4	4	5	2	4	4	5	4	5	2	5	5	4	2	5	2	5	5	5	5	4	5	5	4	5	5	4	4	5
2	4	4	5	5	4	5	4	4	4	4	5	5	5	4	2	5	5	4	4	4	4	4	5	4	4	5	5	5	3	4	4	5	5	4	2	4	4	5	5	5	5	5	5	1
2	5	2	2	4	2	4	5	2	4	5	4	5	5	2	4	5	5	1	4	4	4	5	2	4	4	4	5	2	1	4	2	5	2	4	5	5	5	1	4	4	1	5	1	1
2	4	3	4	3	5	4	5	5	4	5	3	5	5	2	3	4	5	5	4	4	3	5	5	2	4	5	5	5	2	5	5	5	5	4	4	5	4	4	3	4	5	4	4	4
2	5	5	5	2	4	4	5	5	4	5	2	5	5	2	4	4	2	5	1	4	4	2	5	2	4	4	5	5	4	3	3	5	5	2	2	4	4	5	1	4	4	4	4	4
1	2	2	4	5	2	4	4	2	1	4	4	5	5	1	5	3	4	5	5	4	2	2	5	3	4	2	4	3	4	4	2	2	4		2	3	5	4	3	1	2	4	3	4
2	4	2	4	5	4	4	4	4	5	5	4	5	5	2	4	4	5	2	5	5	4	5	5	5	5	5	5	4	5	4	5	4	4	4	5	5	5	4	4	4	5	4	3	4
2	2	2	4	4	4	2	4	2	4	4	2	4	5	2	3	4	4	2	4	4	2	3	4	4	4	2	2	4	4	5	1	5	4	4	4	2	4	4	4	5	4	3	2	2
2	5	5	4	2	5	5	5	3	5	5	3	3	5	1	5	4	5	2	3	5	3	5	3	4	5	5	5	4	3	5	4	5	3	4	5	5	5	4	3	5	5	5	1	5
2	4	4	5	5	5	4	3	3	4	4	4	5	5	3	5	5	5	4	4	5	4	4	4	5	5	5	4	5	3	5	4	4	4	4	4	4	3	4	2	5	5	4	4	4
2	3	3	5	5	4	4	5	5	5	5	5	5	5	4	3	3	4	5	3	5	3	4	5	5	4	5	2	5	5	5	3	4	5	5	4	3	3	5	5	4	3	4	5	3
2	5	5	4	5	4	3	5	4	4	4	5	4	4	2	1	5	5	2	2	2	4	4	5	4	2	5	5	4	4	2	4	4	4	4	3	5	2	4	1	4	2	5	1	2
2	2	3	5	2	4	2	5	5	5	5	4	5	5	2	4	4	5	5	5	5	1	5	5	5	4	4	5	5	2	4	3	5	5	5	4	5	5	5	5	4	5	5	5	5
2	4	2	5	4	4	4	4	2	2	5	4	5	5	2	2	3	4	4	2	3	4	5	5	4	4	5	5	5	3	4	3	4	4	2	5	5	5	5	4	2	4	4	4	4
2	4	4	4	4	4	4	4	5	4	4	4	5	5	2	2	3	4	5	4	4	2	4	4	4	4	4	4	5	4	4	4	5	4	4	4	4	4	5	4	4	4	5	4	3
2	4	2	4	2	4	4	4	4	2	4	2	4	4	2	4	4	2	4	4	4	4	4	4	2	4	4	4	4	2	4	4	4	4	2	4	4	4	4	4	4	4	4	4	4
2	3	5	5	5	4	3	5	5	5	5	4	5	5	3	4	5	5	5	4	5	3	5	5	4	4	4	5	5	5	4	3	5	5	4	3	5	5	5	5	4	5	5	5	4
2	3	1	5	3	5	1	4	5	1	5	2	2	5	1	5	2	1	5	1	5	2	1	5	1	5	4	2	5	2	5	2	2	4	2	1	2	2	5	1	4	5	4	2	3
2	5	3	5	5	5	5	4	2	5	5	5	2	5	2	4	5	4	4	4	5	5	5	5	4	5	5	3	5	2	5	5	4	4	5	5	5	3	5	2	5	5	5	2	5
2	3	5	5	5	4	3	5	4	4	5	4	5	5	2	2	3	5	2	4	4	2	4	4	4	4	2	5	5	5	4	2	5	5	4	2	4	4	4	4	3	4	5	4	2
2	2	2	5	4	4	2	4	4	4	4	4	4	5	1	4	4	4	4	1	4	2	4	4	4	4	4	2	5	4	5	2	4	4	4	4	2	2	5	2	5	5	4	2	4
2	4	2	5	1	5	2	5	3	2	5	3	5	5	1	5	4	5	4	1	5	4	4	5	4	5	4	1	5	2	5	3	4	5	5	4	3	4	4	4	5	5	4	4	5
2	4	4	5	5	4	2	4	4	4	5	4	5	5	2	4	4	4	4	2	4	4	4	5	4	4	4	4	5	4	4	4	4	4	4	4	4	4	4	3	4	5	4	5	3
2	4	5	4	5	4	2	5	2	4	5	4	5	5	2	5	2	5	4	2	5	2	4	5	5	4	2	4	5	5	5	2	5	4	5	4	4	5	5	2	5	5	5	4	5
2	5	4	5	5	5	3	4	5	2	5	4	5	5	2	4	5	5	5	3	5	5	5	5	5	4	4	5	5	5	5	3	5	5	4	3	5	4	5	3	5	5	5	5	5
2	2	4	4	4	2	2	4	3	4	4	1	5	5	2	4	3	5	4	4	4	2	4	2	4	3	2	5	5	5	4	2	4	4	4	4	3	4	4	4	4	4	5	4	4
2	5	4	5	2	2	5	4	3	2	5	5	5	5	1	4	5	3	5	1	5	3	1	5	2	5	5	1	4	2	5	1	5	5	4	5	5	4	5	1	4	2	4	2	4
2	4	4	4	5	2	2	4	5	4	2	4	5	5	2	1	3	4	4	2	4	2	4	4	4	2	3	5	4	4	2	2	5	4	3	2	4	4	4	4	2	2	5	2	1
2	2	4	3	4	4	4	5	2	4	5	4	5	4	3	1	4	4	3	2	4	2	4	2	4	2	4	5	2	4	4	4	5	3	4	2	4	4	4	4	4	4	4	3	3
2	2	2	5	4	4	2	4	4	5	4	2	5	5	3	3	2	5	4	2	4	4	5	3	4	4	3	5	3	4	4	2	4	4	4	4	3	5	4	4	3	4	5	4	4
2	4	4	5	5	4	5	4	2	4	2	4	5	5	4	2	2	4	4	4	2	2	5	2	4	4	4	4	4	5	4	2	5	4	4	3	2	5	5	4	2	2	5	4	2
2	5	4	4	5	5	5	4	5	5	2	5	5	5	5	4	5	5	5	5	3	5	5	5	5	4	5	5	5	5	5	4	5	5	5	5	5	5	5	5	5	4	4	5	1
2	4	2	3	4	4	4	4	2	2	3	3	4	4	2	2	4	4	4	2	4	4	4	3	4	3	4	4	4	4	4	4	4	4	2	4	4	4	4	3	3	4	4	2	2
2	4	4	4	5	4	4	2	4	4	5	4	4	4	2	2	4	4	5	5	4	2	4	5	4	4	2	2	4	4	4	4	4	4	4	5	4	4	4	4	4	5	4	5	4
2	5	4	4	5	5	5	5	2	5	5	5	4	5	1	4	5	5	4	2	5	4	4	5	5	5	5	5	5	4	5	4	5	4	5	5	4	5	5	2	5	5	4	2	5
2	4	3	5	3	4	2	4	5	2	5	4	5	5	2	3	3	2	5	3	4	3	5	5	4	4	2	4	4	3	5	2	5	4	4	5	4	4	4	4	4	5	5	2	4
2	4	2	5	5	5	5	4	5	4	5	5	5	5	4	5	4	4	5	5	3	4	2	5	5	5	5	3	5	5	3	5	3	5	5	4	5	2	5	5	5	2	5	5	4
2	4	3	4	4	3	3	4	4	3	4	4	4	4	2	3	3	4	4	4	3	3	4	4	4	3	4	4	4	3	4	3	4	4	3	3	3	4	4	3	3	4	4	4	4
2	4	5	5	5	4	5	5	5	4	5	5	5	5	5	5	5	5	5	5	5	4	4	5	4	3	5	5	5	5	5	2	5	5	5	4	5	4	5	5	5	3	5	3	1
2	4	5	5	5	4	2	4	4	4	5	4	5	4	4	4	4	5	5	4	4	3	4	5	4	4	4	5	5	3	4	4	4	5	4	1	4	5	4	4	4	2	4	3	3
2	4	3	4	2	3	3	4	2	4	4	4	3	4	2	3	2	4	3	2	4	3	3	2	3	2		2	3	2	4	3	4	3	4	2	3	2	4	2	3	3	4	3	4
2	5	3	5	3	5	4	5	2	4	5	3	3	5	3	4	5	5	2	3	4	3	4	5	5	5	4	3	5	4	5	5	5	5	5	3	5	4	5	4	5	5	5	2	5
2	2	2	5	4	2	2	4	4	2	4	3	5	5	2	3	3	2	4	2	4	2	2	4	3	2	2	4	4	4	4	2	4	3	2	2	3	3	4	1	3	2	4	4	4
2	4	4	4	4	4	3	4	4	4	5	4	4	4	3	4	3	4	2	4	5	2	4	4	4	5	2	4	4	4	5	2	4	4	4	4	3	4	4	3	5	5	4	2	5
2	3	5	5	5	4	3	5	5	5	5	5	5	5	4	4	5	5	5	3	4	3	5	5	5	3	3	5	5	5	4	2	5	5	5	5	5	5	5	5	5	4	5	3	3
1	2	5	5	5	4	4	4	5	5	5	5	5	5	5	5	4	5	5	5	4	4	4	5	5	5	4	5	5	5	5	4	5	4	5	5	4	5	5	5	5	5	5	2	4
2	4	4	4	5	4	3	4	4	4	4	3	5	4	4	3	4	4	3	4	4	4	4	4	4	4	4	4	4	3	5	4	5	4	4	5	4	5	4	3	4	5	4	3	4
2	4	5	5	4	5	2	5	5	5	5	2	5	5	3	4	4	5	4	4	4	3	4	5	5	5	3	5	5	5	5	3	5	5	5	5	5	5	5	4	5	1	4	2	4
1	4	4	4	4	2	3	4	3	2	2	2	5	5	1	2	3	4	4	4	3	3	5	4	3	2	3	4	3	2	3	2	5	3	4	2	4	5	3	2	2	2	3	2	2
2	5	1	5	5	5	5	5	5	1	5	5	5	5	1	5	5	4	5	1	5	5	4	5	1	4	5	5	4	2	5	5	5	4	1	4	5	5	4	1	5	5	4	2	4
1	4	5	5	5	4	2	5	2	4	4	5	5	5	2	4	4	5	5	3	5	4	5	4	4	4	2	5	5	5	4	2	5	4	2	2	4	5	5	2	5	2	5	5	1
1	4	2	4	2	4	2	3	2	2	4	2	2	4	2	3	4	2	4	2	4	4	3	3	2	4	4	2	4	2	4	2	2	4	2	2	2	2	4	2	4	5	3	4	4
2	2	5	4	5	4	3	4	4	4	4	4	5	5	4	2	4	5	4	5	3	2	2	5	5	4	3	4	5	5	4	2	5	4	5	4	4	5	5	2	4	4	5	4	4
2	3	3	4	4	3	2		4	4	4	4	4	5	2	4	3	4	4	3	2	2	4	4	4	3	4	3	4	2	4	2	4	4	4	2	3	4	4	4	4	2	4	4	4
1	3	2	4	4	3	3	3	2	4	4	4	3	4	2	3	3	3	3	2	4	3	3	3	4	3	3	2	3	2	3	3	3	3	4	4	3	3	3	3	4	2	3	2	3
2	5	2	4	2	4	5	4	4	2	4	4	4	5	2	2	5	5	4	4	2	5	4	2	2	5	5	5	4	1	4	2	2	5	2	4	5	4	5	4	2	5	4	1	1
2	2	4	5	5	2	2	3	4	4	4	4	5	5	4	1	2	4	5	5	2	2	4	5	4	2	2	5	4	5	2	2	4	5	4	2	3	4	4	4	2	4	4	5	1
1	4	4	4	4	4	4	4	4	4	5	4	4	5	3	4	4	4	4	2	4	3	4	4	4	4	4	2	4	2	4	2	3	4	4	4	4	4	4	3	4	4	4	3	4
2	3	5	5	3	5	4	5	5	2	5	4	5	5	2	4	5	4	5	3	5	3	5	5	5	4	5	5	5	3	5	3	5	5	4	4	3	4	5	3	5	5	5	5	5
2	5	3	5	4	4	3	4	2	2	4	4	4	5	2	4	4	5	4	2	4	5	5	5	2	4	4	2	4	2	3	5	5	5	4	1	5	4	4	3	3	2	4	4	1
2	4	4	5	5	4	3	5	4	4	5	5	5	5	3	3	4	5	5	3	4	3	4	5	4	4	4	5	4	4	4	5	4	4	4	3	5	4	4	3	4	5	5	3	4
2	4	2	5	2	4	4	4	5	2	5	4	4	5	2	3	4	4	3	2	4	4	5	4	4	3	4	4	5	2	4	3	5	5	3	1	4	4	4	4	4	5	4	4	2
2	4	2	4	4	2	4	3	3	3	4	3	4	4	4	2	3	3	4	3	4	4	4	4	4	3	3	4	4	4	3	2	4	4	3	4	3	3	4	3	2	3	4	2	2
2	4	4	5	1	4	1	4	4	4	2	5	5	5	2	1	5	4	5	5	2	5	5	1	4	4	4	4	5	4	2	4	4	4	4	4	4	4	4	4	2	2	4	4	1
1	4	5	4	5	4	5	4	2	4	4	4	5	5	4	4	2	4	4	2	4	5	3	4	4	4	4	4	4	2	3	5	4	4	4	5	4	4	4	5	4	4	2	4	3
2	2	4	5	3	5	2	5	5	5	5	4	5	5	2	2	2	5	5	2	5	2	5	5	5	5	4	4	5	2	5	2	5	5	5	2	4	5	5	2	4	5	5	5	4
2	4	4	4	5	4	2	4	4	4	4	5	5	5	4	3	4	4	5	4	3	3	4	5	4	3	3	3	4	4	4	2	4	5	4	4	4	5	5	4	4	3	4	4	2
2	1	4	3	5	4	2	5	4	4	3	3	5	5	3	4	2	5	2	4	2	2	5	5	5	4	3	5	5	5	5	3	5	4	5	5	3	5	4	5	4	5	4	2	4
1	4	4	2	2	3	4	4	4	4	5	2	5	5	2	2	4	5	4	4	5	2	4	3	4	3	4	5	2	2	5	2	4	2	4	5	4	4	4	4	5	5	4	2	3
2	2	4	4	4	2	2	4	4	4	2	4	5	5	2	1	3	4	5	1	2	2	4	5	4	2	2	4	2	4	2	2	4	5	4	2	2	5	4	4	2	2	4	4	1
2	4	2	5	4	4	2	4	4	3	4	3	3	5	2	4	3	4	5	2	4	4	5	5	4	3	4	2	5	2	4	4	4	4	4	4	4	2	5	2	5	2	4	4	2
2	4	2	4	2	4	4	4	2	2	2	4	4	5	2	4	4	4	4	1	1	4	4	5	2	2	4	2	4	1	3	4	4	5	4	4	4	4	5	4	4	2	4	4	2
2	4	4	4	5	1	2	5	5	2	5	3	4	5	2	2	4	4	4	2	2	4	5	5	4	1	4	5	4	5	5	4	5	4	4	4	4	5	5	2	4	5	5	4	4
2	4	4	5	5	4	4	4	2	4	4	4	5	5	5	3	4	1	2	5	4	3	4	5	5	4	3	5	4	5	5	4	5	4	5	5	4	5	4	5	4	5	4	2	3
2	5	3	5	4	5	3	4	4	4	4	4	4	5	1	3	4	4	3	3	4	3	4	5	4	4	5	3	5	4	4	4	5	5	4	3	5	4	5	3	4	4	3	4	3
2	3	4	5	5	4	2	4	3	4	5	5	5	5	4	4	5	3	3	5	5	2	4	3	4	5	3	5	5	5	5	2	5	5	4	4	5	5	4	5	4	5	4	2	4
2	4	2	4	3	3	2	4	4	2	4	4	3	5	2	3	4	4	4	2	3	4	4	5	4	4	4	3	4	2	4	4	5	4	4	3	2	2	4	2	2	4	4	5	3
2	5	2	5	3	4		4	5	4	4	4	5	4	3	2	4	4	4	4	4	5	4	5	4	4	4	4	4	3	5	4	4	4	4	3	4	5	4	4	3	5	4	4	5
2	1	5	4	5	2	2	2	4	4	4	4	3	4	4	2	2	2	4	5	2	1	4	4	2	1	4	4	4	4	2	2	4	4	5	4	2	2	4	4	2	1	4	2	2
1	2	5	5	4	4	2	5	5	3	5	3	5	5	4	4	3	5	5	3	5	1	5	2	4	5	1	5	4	4	5	1	5	5	4	3	2	5	4	5	4	5	5	4	4
1	3	3	2	2	2	4	2	2	2	2	3	2	2	4	2	3	2	2	3	2	3	2	3	2	2	3	3	2	3	2	3	2	2	2	2	2	3	2	3	3	2	2	2	4
1	1	3	3	5	4	4	4	5	4	4	2	5	5	2	2	1	4	4	5	4	2	4	2	4	4	2	5	2	5	4	2	4	4	3	5	4	5	4	3	4	4	4	4	2
2	5	5	5	5	5	4	5	3	4	5	5	5	5	3	5	4	5	3	2	5	3	5	5	4	5	4	5	5	5	4	5	5	5	4	4	4	5	5	5	5	3	5	2	3
1	2	2	5	3	3	4	4	4	4	5	3	5	5	3	4	3	1	5	3	2	5	2	5	5	3	3	1	5	5	5	4	4	5	4	4	3	2	5	3	2	1	3	5	4
2	2	2	5	3	3	3	4	4	3	4	4	5	5	3	3	4	4	5	2	3	2	4	5	4	3	4	5	3	3	3	2	5	4	3	3	4	5	4	2	3	4	5	4	3
2	4	5	4	5	4	2	5	3	2	4	4	5	5	3	2	4	4	2	4	4	3	5	4	4	4	3	5	4	4	5	4	5	4	3	4	5	5	4	4	3	4	4	2	2
2	4	2	4	4	4	4	4	4	2	5	1	4	5	2	4	2	4	4	2	5	4	4	4	2	4	3	4	4	2	5	2	4	4	2	2	4	2	4	2	4	5	4	4	4
2	2	5	2	4	4	2	4	2	4	5	3	5	4	2	4	3	5	2	4	4	2	5	4	5	4	4	4	4	2	2	2	4	2	4	3	4	4	4	4	4	2	5	4	4
2	4	3	3	4	3	4	4	2	1	4	2	5	3	2	1	3	4	4	2	2	3	4	3	4	2	4	2	3	5	4	3	4	4	2	2	4	4	4	3	3	2	4	4	3
2	2	4	4	4	4	2	4	4	4	2	2	5	3	4	4	2	2	4	4	4	2	4	1	4	4	4	2	4	5	3	2	4	4	4	4	2	5	4	4	4	4	4	4	1
2	4	2	5	5	4	4	4	5	4	4	5	5	5	2	4	4	4	5	4	4	4	5	5	5	5	5	3	5	4	4	4	4	5	4	4	4	4	4	4	4	4	4	4	4
2	5	4	5	5	5	5	4	4	4	5	3	5	5	4	4	4	4	4	4	3	5	4	3	5	4	5	5	4	4	3	5	4	5	4	4	4	5	3	5	4	4	4	4	3
2	5	5	5	4	5	4	5	5	4	5	4	5	5	4	5	5	5	5	2	4	4	3	4	4	5	5	5	5	5	5	4	5	5	4	4	5	5	4	4	5	5	5	4	5
2	2	4	4	5	4	4	4	4	1	4	3	5	4	2	4	4	5	4	5	3	2	4	4	5	3	3	5	5	5	4	2	5	4	4	2	3	5	4	5	4	5	4	3	3
2	2	1	5	5	4	1	2	5	5	3	5	5	5	3	1	5	3	5	5	5	3	1	1	5	4	4	5	5	5	1	5	5	5	5	3	4	5	5	5	5	1	4	5	1
2	2	2	5	5	4	2	4	4	4	5	4	4	5	2	2	2	4	5	4	4	2	2	4	4	4	4	2	5	4	5	4	2	5	4	5	4	4	4	4	2	5	4	4	5
2	4	5	5	5	5	2	5		5	5	5	5	5	2	4	5	5	4	2	5	2	5	4	4	4	4	5	5	5	5	4	5	5	5	1	5	5	5	2	5	5	5	4	4
2	4	5	3	5	4	2	4	3	2	5	4	5	4	2	4	3	4	4	4	4	2	3	4	4	4	4	5	4	4	5	2	5	4	4	2	4	5	4	2	3	4	4	5	3
1	4	5	4	4	4	5	4	2	5	5	2	4	5	4	4	4	4	2	5	5	4	5	2	2	5	4	2	4	2	4	4	4	4	5	5	4	2	5	2	4	4	4	2	2
1	4	5	5	5	4	2	5	5	4	5	4	5	5	3	3	4	5	5	4	4	3	5	5	4	4	4	5	5	4	4	2	5	5	4	3	4	5	5	5	4	3	5	5	2
2	3	2	2	3	3	2	3	2	4	5	2	5	4	2	4	2	3	2	4	4	2	3	2	3	4	2	2	2	2	4	2	3	2	3	4	2	4	4	4	4	4	4	2	1
2	5	2	4	3	3	5	5	3	2	4	5	5	5	2	4	5	5	2	2	4	5	5	4	4	3	4	5	4	2	5	5	5	4	3	2	5	5	4	4	3	4	4	2	2
2	4	3	4	1	4	4	4	2	1	3	1	1	5	2	4	2	4	2	3	4	4	4	4	2	5	4	2	3	1	4	4	4	4	2	3	3	4	4	2	3	2	4	4	4
2	3	5	4	4	4	2	4	2	4	5	2	5	4	2	4	3	5	4	4	4	2	4	2	5	4	2	4	4	2	5	2	5	3	3	2	3	4	4	4	5	5	5	3	5
2	4	2	4	4	4	2	4	2	3	5	3	4	4	2	3	4	4	4	2	4	2	4	4	4	4	4	3	4	4	4	2	5	5	5	2	4	5	5	4	5	4	4	4	3
2	2	2	3	2	4	2	3	2	2	4	2	4	4	2	3	2	2	2	2	3	2	2	2	2	4	3	1	2	2	4	3	2	2	2	2	2	2	3	2	2	4	4	3	3
2	5	3	5	3	5	3	4	5	2	5	5	3	4	2	4	5	1	5	3	3	3	4	5	3	3	5	2	4	3	3	2	4	5	3	5	4	5	4	2	4	3	4	5	3
2	5	4	5	5	2	5	5	5	2	4	4	5	5	2	4	5	5	4	4	4	5	5	5	4	1	4	5	5	2	5	5	5	5	2	2	5	5	4	2	2	4	5	5	3
2	2	2	2	2	2	2	4	4	2	5	2	4	4	2	4	2	2	4	2	4	2	4	4	4	4	2	3	4	2	5	2	4	4	4	4	2	2	4	2	4	5	4	4	4
2	4	5	5	5	3	1	5	3	5	5	5	5	5	3	4	4	5	5	5	3	2	5	5	5	3	3	3	3	5	5	3	5	5	5	3	4	5	5	5	4	5	5	3	5
2	4	4	4	3	4	4	4	3	2	5	4	4	5	2	3	4	4	2	3	3	4	4	5	4	4	3	5	4	4	4	3	4	2	4	5	4	5	4	4	4	4	5	3	2
2	4	2	4	5	2	3	4	4	4	4	2	5	4	2	2	2	5	2	4	4	2	5	4	4	4	2	5	4	4	4	4	4	3	4	4	4	4	4	5	4	4	4	3	2
2	3	4	5	5	3	2	4	5	2	5	2	3	5	4	2	3	5	4	4	4	4	5	4	5	1	5	5	4	5	4	5	5	4	4	4	4	5	4	5	2	2	5	4	3
1	3	4	4	5		2	4	4	4	5	4	5	5	4	4	4	5	4	4	5	3	5	5	5	4	4	4	4	5	5	4	5	4	4	4	4	4	3	4	5	5		2	4
2	5	4	5	5	5	5	5	5	2	4	5	4	5	4	3	5	5	5	4	2	5	4	5	4	5	5	5	5	4	5	5	5	5	1	5	5	5	5	2	5	5	5	4	3
2	2	2	5	2	2	2	2	3	5	4	2	2	5	2	3	4	4	5	2	1	1	5	2	4	1	1	3	4	1	2	1	5	5	5	1	1	1	5	1	1	2	5		1
2	3	4	4	5	2	2	4	3	2	5	1	5	5	3	3	1	4	2	2	3	2	3	4	3	2	1	4	3	4	5	2	4	2	3	4	4	5	3	2	4	4	4	2	4
2	5	3	3	5	5	3	3	3	4	4	5	5	4	3	3	5	3	5	3	4	4	2	5	4	5	4	3	5	5	5	4	3	3	3	3	4	5	3	3	4	5	3	3	3
2	2	4	4	2	4	2	5	2	1	4	2	5	5	1	5	3	4	2	1	4	2	2	2	1	4	4	1	2	2	3	2	5	2	1	2	4	2	2	1	3	4	4	2	1
2	3	4	4	5	4	3	4	5	3	4	3	5	5	2	3	3	4	4	4	4	3	5	3	3	3	2	5	4	5	4	2	5	4	2	2	4	5	4	2	5	4	5	3	3
2	4	4	4	5	5	2	5	2	2	4	2	5	5	2	1	3	4	2	2	4	4	5	4	2	4	2	4	4	2	3	4	4	2	2	2	2	3	4	2	3	4	4	2	1
2	2	2	4	5	1	2	2	1	5	5	5	5	5	5	1	5	2	5	5	2	2	5	5	5	1	4	4	5	5	5	4	2	5	5	2	4	2	5	5	1	4	4	4	5
2	5	2	5	4	5	4	4	4	1	5	4	3	5	2	4	4	4	5	3	1	5	5	1	3	5	5	3	4	2	3	4	4	5	4	2	5	3	5	3	5	3	5	5	2
2	3	3	4	4	2	2	4	4	4	4	1	5	5	3	3	2	4	5	3	3	4	4	4	4	3	2	4	4	2	3	2	4	4	5	2	2	5	4	4	1	5	4	4	2
2	2	5	4	5	2	2	5	4	4	3	3	5	4	2	2	2	5	4	3	2	2	5	5	4	2	3	4	4	5	2	2	5	4	4	1	4	5	4	3	4	2	4	4	1
2	4	4	5	5	5	3	5	4	4	5	5	4	5	4	4	5	5	5	5	5	3	4	5	5	4	5	5	5	4	5	3	5	5	4	4	5	4	4	5	4	4	5		4
2	3	4	2	1	4	2	4	4	1	4	1	5	5	1	3	2	4	1	2	4	2	2	2		2	2	4	2	2		2	4	1	2	5	2	4	2	2	4	4	4	1	3
2	1	4	4	3	4	2	4	3	4	4	2	5	4	2	2	3	4	2	4	2	1	5	4	4	2	3	4	4	4	4	1	5	4	3	4	3	4	4	4	3	2	4	3	2
2	5	2	2	4	3	5	4	2	1	3	2	2	4	1	3	5	4	2	2	4	5	4	2	4	3	5	5	5	3	5	5	5	4	4	5	5	3	5	3	4	5	3	1	3
2	5	2	4	5	5	5	5	2	5	5	5	5	5	2	4	5	4	3	4	4	5	5	5	5	5	5	5	4	4	5	5	5	4	5	5	5	5	4	5	5	3	5	2	1
2	3	5	2	4	3	2	4	4	4	4	2	5	3	4	3	3	5	2	4	3	2	5	2	4	3	3	4	3	4	5	4	4	2	4	2	3	5	2	4	3	5	5	4	4
2	4	1	5	3	5	2	3	4	1	5	4	3	4	1	5	5	2	5	1	5	4	3	4	2	5	4	4	4	3	5	2	3	5	1	5	4	3	4	1	5	5	2	4	5
1	2	2	5	5	5	2	4	5	4	5	2	5	5	3	5	2	2	3	4	5	2	1	2	3	5	4	2	4	1	4	4	2	5	5	5	3	1	4	4	2	4	3	5	4
2	3	4	4	5	4	3	5	4	4	4	4	5	5	4	3	4	5	4	4	4	2	4	5	5	4	2	5	4	3	4	4	5	4	4	4	4	5	4	3	4	4	5	4	2
2	4	2	4	1	5	4	4	2	4	5	3	4	5	1	4	4	3	3	2	4	3	4	3	2	4	4	3	5	1	5	3	4	4	5	4	3	2	4	2	4	4	4	2	4
2	4	4	4	5	5	5	5	4	2	5	2	5	4	2	5	5	2	4	2	5	5	4	4	4	4	4	5	4	5	5	5	5	4	2	5	4	5	4	2	5	5	4	2	5
2	2	2	4	2	4	2	2	2	2	4	2	5	5	2	5	2	4	4	2	4	2	2	2	4	4	4	2	4	1	4	2	3	4	4	2	2	2	4	2	5	4	3	3	2
2	4	2	5	4	2	2	4	5	2	2	3	4	5	2	1	4	5	5	2	3	4	5	5	4	2	4	4	5	2	3	2	5	5	2	2	2	5	5	1	2	4	5	5	3
2	4	3	4	4	5	4	5	5	3	5	4	5	5	2	5	4	5	5	4	5	3	4	4	4	5	4	4	5	4	4	5	4	5	4	3	4	4	4	4	5	4	5	2	3
2	3	5	5	5	5	2	4	4	4	5	4	5	5	4	4	4	4	5	5	4	2	5	5	5	4	4	4	5	5	5	2	5	5	4	4	2	5	5	5	4	4	5	5	5
2	4	4	5	5	5	5	5	5	4	5	5	5	5	4	4	5	5	5	5	5	5	5	5	4	5	4	5	5	5	4	5	5	5	2	4	5	5	5	5	4	4	5	2	2
1	4	2	5	5	5	4	4	5	5	5	5	5	5	5	4	4	4	5	2	5	4	3	5	5	5	4	2	5	5	4	3	4	5	5	4	5	4	5	5	5	5	4	5	4
2	4	5	4	3	3	3	5	3	4	4	4	5	5	2	4	4	5	3	2	4	3	4	4	4	4	4	4	4	3	5	3	4	4	4	3	5	4	5	3	4	4	5	3	3
2	3	3	4	5	5	2	3	2	3	5	3	4	5	4	5	2	5	2	4	5	2	4	2	4	5	2	2	5	3	5	2	3	4	5	2	1	1	4	4	5	5	4	2	5
2	2	2	4	3	3	2	4	3	3	4	3	4	5	2	4	3	4	4	2	4	2	4	5	4	3	3	2	4	2	3	2	4	4	4	2	2	4	4	3	3	3	4	3	2
2	4	3	4	5	5	5	4	4	4	5	4	5	5	4	5	5	4	4	5	5	5	4	5	4	4	3	5	4	4	5	5	5	4	4	5	5	5	4	5	4	5	5	4	5
1	4	2	5	5	5	4	4	4	4	4	3	4	5	2	4	4	2	5	4	5	5	5	4	4	4	5	4	4	4	4	5	4	4	4	4	5	4	4	5	4	5	4	4	2
2	5	4	4	4	4	5	4	4	4	5	4	5	5	4	2	5	5	4	2	4	5	5	4	4	2	4	5	4	4	5	4	4	4	4	4	4	5	4	4	2	5	4	4	4
2	1	4	2	3	3	1	3	3	4	5	1	5	4	2	2	2	4	2	3	3	1	2	1	4	1	1	3	5	4	5	1	3	2	4	5	2	5	4	3	4	5	4	2	5
1	4	3	5	3	5	2	3	5	2	5	2	5	5	4	5	2	3	5	5	5	2	3	5	3	5	3	4	5	2	5	2	5	5	2	4	3	2	4	2	5	2	5	3	2
1	1	2	4	4	2	1	3	2	4	4	2	5	5	2	2	2	4	2	3	4	1	5	3	3	2	2	2	4	3	4	1	4	2	3	2	1	2	3	2	3	2	4	2	2
2	2	4	4	4	2	2	4	4	2	3	3	5	5	3	1	3	4	5	2	3	2	4	5	3	3	2	3	4	4	5	2	4	4	3	4	2	5	4	3	3	4	4	4	2
1	4	4	4	4	4	4	4	2	5	4	4	5	5	2	2	4	4	2	4	2	4	4	5	5	2	4	4	2	2	4	2	5	5	5	4	4	4	4	5	5	2	5	4	1
2	2	2	4	4	4	2	4	2	4	4	3	5	4	2	3	3	5	4	2	5	1	4	4	4	4	1	3	5	3	3	2	4	4	4	1	4	4	2	3	2	3	4	2	3
2	4	2	5	3	5	4	4	5	2	5	4	4	5	2	4	4	4	5	2	4	4	4	5	3	5	5	3	5	2	5	4	3	5	2	5	4	3	5	4	4	5	4	5	5
2	5	2	5	4	4	4	5	4	2	4	4	4	5	2	3	3	4	4	2	4	4	4	5	4	4	5	2	4	4	3	4	4	4	2	1	4	3	4	3	4	3	4	4	2
2	3	2	4	4	4	4	4	2	4	5	2	1	5	2	4	3	4	3	5	4	3	4	2	5	4	4	2	4	2	5	4	4	4	5	5	4	2	4	5	4	5	4	2	4
2	3	2	4	2	4	2	4	3	2	5	4	5	5	2	4	4	4	4	3	3	2	4	2	4	4	2	2	3	2	2	2	4	4	3	5	4	2	3	3	4	2	4	3	2
2	4	3	2	3	4	4	5	2	2	5	3	5	5	3	3	3	3	2	1	5	4	4	2	2		3	4	3	3	4	4	5	4	2	2	4	5	4	1	4	4	5	3	1
2	2	2	1	2	1	2	4	2	2	5	2	5	4	4	1	1	5	4	4	1	1	5	4	4	1	1	4	5	5	5	1	4	2	4	2	2	4	4	4	4	2	4	4	1
2	2	4	5	2	5	4	4	5	1	4	4	5	5	2	4	4	2	5	2	5	2	4	4	2	5	4	4	5	2	5	2	4	4	4	4	4	5	4	2	4	5	4	4	5
2	2	4	5	5	4	2	5	4	4	5	4	5	5	2	3	2	5	5	2	4	2	4	5	5	5	2	5	4	3	5	2	5	5	4	3	4	5	5	5	3	5	5	4	4
2	4	5	5	4	4	2	4	2	4	5	4	5	4	3	4	4	4	2	2	4	4	4	3	4	4	4	5	5	5	5	3	5	4	4	4	4	5	4	5	4	4	4	4	4
2	4	5	5	5	5	3	5	2	4	5	5	5	5	3	3	5	5	5	3	5	2	5	5	4	5	4	5	5	2	3	2	5	4	4	1	5	5	5	3	4	4	5	5	3
2	2	2	5	4	4	1	5	5	4	3	3	5	5	2	5	4	5	4	4	5	1	4	2	5	5	2	2	5	2	5	1	5	5	5	1	3	4	3	4	5	5	5	4	2
2	5	2	5	5	5	3	4	4	4	4	4	5	5	2	4	4	4	5	3	4	3	5	3	4	5	4	5	5	2	4	2	5	5	5	4	5	3	5	4	4	4	5	3	3
2	4	4	5	5	4	3	4	5	3	3	4	5	5	3	3	5	5	5	3	4	3	4	5	4	3	4	4	5	5	2	4	5	5	4	1	4	4	5	4	4	4	5	4	3
2	5	3	5	3	3	4	5	4	4	4	4	5	5	2	3	4	4	5	5	3	4	5	5	5	2	4	2	5	4	3	4	5	5	4	3	5	3	4	4	3	2	5	3	3
1	2	2	4	5	4	2	5	5	4	5	4	5	5	3	4	4	4	4	5	4	2	4	5	5	5	4	5	5	4	5	2	5	4	4	3	4	4	5	4	5	5	5	2	5
1	2	4	4	3	4	2	5	3	2	5	4	4	5	2	4	2	4	5	2	4	2	4	5	3	4	2	5	4	2	3	2	4	4	3	1	2	5	4	2	4	2	4	5	1
2	3	4	3	2	2	2	4	2	2	3	3	4	4	3	2	2	4	4	2	3	4	4	4	2	4	2	3	4	2	3	2	4	3	2	4	3	4	3	2	4	2	3	3	2
2	4	4	5	3	4	2	5	5	4	3	3	5	5	2	3	4	5	5	3	3	3	5	5	4	3	4	5	5	3	3	2	5	5	4	1	4	5	5	2	3	3	5	4	3
2	2	4	4	2	5	2	4	4	2	5	4	5	5	2	4	2	4	4	2	4	2	4	5	4	4	2	2	4	2	4	2	4	4	2	4	2	2	4	1	4	4	5	4	5
2	2	4	4	5	4	2	5	5	4	4	2	5	5	4	2	2	5	5	2	4	1	5	4	4	4	2	4	5	5	5	1	5	5	4	2	4	5	4	4	4	5	5	4	2
2	1	5	4	3	4	2	4	5	4	5	4	5	5	5	4	3	4	5	2	4	1	4	4	4	5	2	3	4	4	4	2	4	4	4	4	3	5	4	5	4	5	4	5	4
2	3	4	5	4	5	2	4	4	1	5	4	5	5	1	5	5	4	4	2	4	4	4	5	3	4	5	1	5	1	5	2	4	5	4	3	4	2	5	1	5	4	4	4	4
2	3	5	4	5	5	3	4	5	4	5	5	5	5	3	4	4	5	5	2	4	3	4	5	5	4	4	4	5	5	5	3	5	5	4	5	4	5	5	4	5	5	5	5	5
2	3	4	4	4	3	3	4	4	3	4	3	4	4	3	3	3	4	3	2	4	3	4	4	4	4	3	4	4	4	4	3	4	3	4	4	2	3	4	4	3	3	4	2	3
2	4	4	5	5	4	2	4	4	3	4	3	5	5	2	3	4	5	4	5	4	4	4	5	4	4	3	5	5	5	5	4	5	4	4	3	4	5	3	3	3	4	5	4	3
2	2	5	5	5	5	2	5	5	5	5	5	5	5	5	5	5	5	5	5	5	2	5	5	5	4	5	5	5	5	5	2	5	5	5	5	4	5	4	5	5	5	5	5	3
2	3	3	5	4	3	3	4	2	4	5	2	5	5	3	2	4	4	4	3	4	3	4	4	4	3	4	2	5	3	4	3	4	5	4	1	3	4	5	4	4	2	4	4	2
2	2	4	4	5	4	2	5	4	2	5	2	5	5	2	4	2	4	4	4	2	1	5	5	2	4	3	1	5	5	4	2	5	4	2	2	2	5	5	4	4	2	4	4	4
2	4	5	4	5	5	4	5	3	5	5	5	5	5	3	5	5	5	4	5	5	4	5	4	5	5	5	5	5	5	5	5	5	5	5	3	5	5	5	5	5	5	5	5	5
2	2	4	4	4	4	2	4	4	4	4	4	4	5	2	3	4	4	4	2	4	2	3	4	4	3	2	3	4	2	4	2	4	4	4	2	2	3	4	2	4	2	4	2	2
2	3	4	4	5	4	2	4	4	4	4	4	5	5	3	3	4	4	4	3	4	2	4	4	4	4	4	4	5	4	5	2	4	4	4	2	4	4	4	3	4	4	4	4	4
2	4	4	4	4	3	3	4	4	4	5	4	4	5	3	3	4	4	4	4	3	4	4	4	4	2	4	4	4	3	4	4	4	4	3	3	4	4	4	4	3	4	5	4	3
2	2	3	4	5	4	1	4	2	2	4	4	5	5	2	5	4	4	2	1	5	1	5	2	5	4	3	3	4	3	5	2	4	3	2	2	3	5	4	2	4	4	4	3	3
2	1	5	5	4	5	4	5	5	4	4	4	5	5	5	5	5	4	5	5	5	2	5	5	5	5	5	4	5	5	5	5	5	5	5	5	2	5	4	5	5	5	3	5	4
2	4	5	5	5	5	2	5	5	5	4	5	5	5	2	4	5	5	5	4	5	1	5	5	5	5	3	5	5	3	3	3	5	5	5	2	5	5	5	5	4	3	5	5	4
2	3	3	4	3	4	2	3	3	4	5	3	4	5	1	4	3	3	5	4	4	2	4	4	4	4	2	2	4	3	5	4	4	4	4	3	3	4	5	4	5	4	4	3	4
2	4	5	2	2	5	4	5	2	2	5	4	5	4	2	5	5	5	2	2	5	2	4	2	2	5	2	5	4	2	5	4	4	2	2	4	4	5	2	4	5	5	4	2	5
1	2	4	4	2	3	3	5	4	2	3	4	5	5	2	3	2	4	4	2	4	2	5	4	2	3	2	5	4	2	3	2	5	4	4	4	3	5	2	2	3	2	4	5	2
2	3	3	3	2	4	3	4	4	3	5	1	5	4	1	5	3	5	3	1	5	3	4	5	3	4	3	5	3	3	5	4	5	4	4	5	4	5	3	5	4	5	4	4	4
1	3	3	2	4	3	4	3	4	4	4	2	4	3	3	2	4	4	4	3	3	3	3	3	2	4	3	4	3	4	2	4	3	3	3	4	4	4	3	3	2	4	2	4	1
2	2	4	5	5	4	2	4	4	4	4	5	4	5	4	4	4	4	4	4	4	2	4	4	4	4	4	4	4	4	4	2	4	4	4	4	3	4	4	4	4	4	4	4	3
2	4	4	4	5	3	5	5	2	4	3	4	5	4	3	2	5	5	4	2	4	5	5	5	4	2		4	4	4	2	4	5	2	4	2	5	5	4	3	2	5	5	2	2
2	4	3	3	5	2	3	5	2	4	4	4	5	5	2	3	3	5	5	4	3	3	4	4	5	3	4	4	4	5	3	4	5	5	5	2	4	5	4	4	3	3	4	4	1
2	5	1	5	4	4	4	4	4	4	4	4	5	5	2	4	4	4	5	4	5	5	4	4	5	3	4	4	5	2	5	4	5	5	4	4	4	5	4	5	5	5	5	4	2
1	4	2	4	4	4	2	4	4	4	5	3	5	5	3	5	3	5	4	3	4	2	4	4	4	4	2	2	4	2	5	2	4	4	4	5	3	3	4	3	5	5	4	2	4
2	4	5	4	5	2	3	5	5	2	5	4	5	5	4	3	4	5	4	4	1	5	4	4	4	2	4	5	4	4	3	5	5	4	4	2	4	4	4	5	3	2	5	4	2
2	2	2	4	5	5	2	5	5	4	5	3	5	5	3	4	3	5	4	2	4	3	4	5	4	5	3	4	5	5	5	3	5	5	4	4	3	5	5	3	4	4	4	4	3
1	4	4	5	4	4	4	5	4	5	4	3	5	5	2	3	4	5	4	4	4	2	5	4	5	4	4	5	4	3	4	2	5	4	4	4	4	4	4	4	4	4	5	4	3
2	3	4	4	5	4	3	5	4	4	3	3	5	5	4	3	4	4	4	3	3	3	4	4	4	3	3	4	4	5	4	3	4	3	3	3	3	5	4	4	4	3	5	4	4
2	2	3	4	4	3	2	5	4	4	5	3	5	5	1	2	4	5	4	2	4	2	4	5	4	4	3	5	5	2	4	2	5	5	4	2	3	5	2	2	4	5	5	2	3
2	4	4	4	5	4	2	4	4	4	4	4	5	4	4	2	3	4	4	2	4	2	4	4	4	3	4	4	4	5	3	2	4	4	4	3	4	5	4	4	3	2	5	5	1
2	2	4	3	5	2	2	4	3	4	4	3	5	4	3	2	3	3	3	4	3	2	4	3	4	2	2	4	4	4	4	2	4	3	4	2	3	4	4	4	3	2	4	3	4
2	3	4	3	4	4	3	4	2	2	4	3	5	4	4	3	3	4	2	4	4	3	5	5	5	4	4	4	4	4	4	2	4	3	4	3	2	4	4	4	5	5	4	3	3
1	2	2	5	2	5	2	4	2	1	5	3	2	5	1	5	3	2	2	2	4	2	2	4	2	5	4	2	4	2	5	4	2	4	4	2	1	2	3	1	5	5	4	1	5
2	2	4	5	5	5	2	4	5	1	5	4	5	5	1	4	4	5	5	1	5	1	5	5	5	4	2	1	5	5	5	1	5	5	5	5	4	5	5	4	5	4	5	5	4
2	4	3	4	4	4	2	5	2	3	5	2	5	5	2	5	4	4	4	2	5	2	5	4	2	4	2	4	4	2	3	2	5	4	3	5	2	3	4	3	4	4	4	3	2
2	2	5	5	3	4	2	5	5	4	5	4	3	5	2	4	3	4	5	2	5	3	4	5	2	5	4	4	5	4	5	2	5	5	4	4	4	5		3	3	5	5	4	3
2	2	2	5	5	4	1	4	3	2	4	5	2	5	2	4	4	4	5	3	4	1	5	5	4	4	3	4	4	5	5	1	5	5	4	4	4	2	4	3	3	5	4	4	5
2	1	5	5	2	5	1	5	5	4	5	4	5	5	2	5	2	5	2	4	4	1	5	5	4	5	2	4	5	1	5	1	5	5	4	5	5	5	5	1	5	1	5	4	5
2	5	4	4	4	5	2	5	2	4	5	4	5	5	2	5	4	5	2	2	5	2	4	2	5	5	4	4	4	4	5	1	5	4	4	4	5	4	4	4	5	5	5	2	4
2	2	5	5	5	4	2	5	5	2	2	2	5	4	2	1	3	1	5	4	4	2	5	5	4	3	1	5	4	3	4	2	5	5	2	2	4	5	5	2	4	2	4	4	1
1	2	2	4	4	4	2	4	4	4	2	2	4	4	2	4	2	2	4	2	2	1	4	4	2	2	2	4	4	2	2	1	4	4	4	2	2	4	4	4	2	2	4	4	2
2	5	4	2	5	4	4	4	2	4	5	2	5	4	4	4	4	4	1	2	5	4	4	2	4	5	4	4	4	5	5	3	4	2	3	5	4	5	4	4	5	5	3	2	4
2	3	2	4	5	4	2	4	5	5	3	4	5	5	5	3	3	5	5	4	3	2	4	5	5	4	2	4	4	5	3	2	4	4	5	2	3	5	5	5	3	2	4	3	2
2	4	4	5	4	4	4	4	4	4	4	4	5	5	4	1	4	5	4	4	4	4	5	5	4	4	4	5	4	4	4	2	5	4	4	2	4	4	4	4	4	1	4	4	4
2	2	5	4	4	3	2	4	4	4	4	3	5	4	4	4	3	5	4	2	4	2	4	5	2	3	4	4	4	4	4	2	4	4	4	2	3	5	4	3	4	4	4	4	4
2	2	4	5	2	2	2	4	5	3	2	2	5	5	2	3	2	4	5	1	2	2	4	5	2	1	2	4	4	5	4	2	5	5	4	4	3	5	4	4	2	2	5	2	2
2	2	2	2	2	4	2	4	4	2	4	4	3	4	2	3	2	4	2	2	4	2	4	2	4	4	2	2	2	2	3	2	5	2	3	2	3	4	4	4	4	4	5	2	2
2	3	4	5	3	4	2	5	4	4	5	3	5	5	2	4	5	3	5	3	4	3	5	5	2	4	4	5	5	4	5	2	5	5	3	5	5	3	5	3	4	2	5	5	4
2	4	4	3	5	2	3	4	4	2	5	2	5	4	2	3	3	4	4	3	4	4	4	5	3		4	4	4	5	4	4	4	4	4	4	5	4	4	4	4	3	5	5	4
2	3	5	4	5	4	2	5	3	4	4	2	5	4	3	4	4	5	4	2	3	2	5	2	4	3	4	3	4	5	4	3	5	4	4	2	4	5	4	5	3	1	5	3	1
2	5	3	5	5	5	3	4	5	1	5	5	4	5	1	3	4	4	2	1	5	4	5	5	5	5	5	5	5	3	4	1	4	4	1	1	4	4	5	1	5	5	5	2	4
2	5	2		2	5	4	5	1	4	5	5	2	4	2	5	5	3	2	2	5	4	4	5	2	5	5	5	5	4	5	2	5	2	4	5	5	2	2	2	5	5	5	1	5
2	5	2	5	3	4	4	4	5	2	5	5	5	5	2	2	5	4	1	2	5	4	4	5	2	4	2	5	5	2	5	2	5	5	4	4	5	5	5	2	4	4	5	2	2
2	4	5	5	5	2	1	5	5	2	4	2	2	5	2	1	5	5	5	1	4	2	5	5	4	4	2	5	5	2	3	5	5	5	1	1	4	5	5	2	2	4	5	5	1
2	4	2	4	1	4	2	2	2	1	5	2	4	4	1	4	4	2	2	2	4	4	4	2	1	2	4	4	2	1	5	4	5	4	4	5	4	4	2	2	4	5	4	2	4
2	4	3	4	4	4	3	4	3	4	4	3	4	5	3	2	4	4	4	3	4	2	5	3	4	4	3	4	4	2	4	2	5	4	3	3	3	4	4	4	3	2	4	4	2
2	5	4	5	5	4	4	5	5	4	4	5	5	5	2	3	5	5	5	4	4	4	5	4	5	4	4	5	5	5	5	4	5	5	4	4	5	5	5	4	4	5	5	5	4
2	4	5	4	5	5	2	5	3	2	5	5	5	4	2	5	4	5	3	2	5	4	5	4	4	5	4	5	4	4	5	2	5	4	2	5	5		4	3	4	5	5	2	4
2	5	2	4	4	5	5	4	2	2	5	5	3	5	1	4	5	5	4	4	5	5	2	4	2	5	5	3	5	2	5	5	4	4	2	4	5	2	5	4	5	5	4	2	5
2	4	5	5	4	2	2	5	5	2	4	4	5	5	2	2	4	5	4	2	2	2	5	5	4	1	2	5	4	2	4	2	5	5	4	1	4	5	2	4	2	2	5	3	2
2	2	4	4	4	3	2	4	2	4	4	4	4	4	2	2	3	4	4	4	2	2	4	2	4	2	2	4	2	2	3	2	4	4	4	4	4	4	4	4	2	4	4	2	2
2	2	4	5	5	5	2	5	4	5	5	4	5	5	4	5	4	4	4	5	5	2	3	5	5	5	4	3	5	4	5	2	5	4	5	5	4	2	5	5	5	5	5	5	5
2	4	4	5	4	4	2	5	4	4	4	5	5	5	1	3	4	5	5	4	4	4	4	5	5	4	4	3	5	2	5	4	5	4	5	1	4	5	5	2	3	5	5	4	4
2	2	4	3	4	4	4	3	4	3	5	3	5	5	2	4	3	5	4	3	4	2	3	4	4	5	3	3	5	5	5	4	4	4	3	4	3	4	5	3	5	5	4	3	5
2	4	4	5	2	4	2	5	5	3	4	3	3	5	2	4	3	5	3	3	3	2	5	4	4	4	2	4	4	1	3	2	5	5	4	2	4	5	4	4	4	2	5	4	1
2	4	5	4	3	4	2	5	4	5	5	4	5	5	4	5	4	5	4	5	5	2	4	5	4	4	4	4	4	2	5	2	5	5	5	5	4	3	5	5	5	5	5	4	4
2	4	2	5	2	4	3	4	5	3	4	4	2	5	2	4	4	4	5	1	4	3	5	5	1	4	4	2	4	1	3	3	4	4	4	3	4	2	4	3	3	4	4	5	5
2	5	4	5	5	4	2	5	5	4	2	5	5	5	4	1	3	5	3	3	4	5	5	5	3	4	5	5	4	5	1	5	5	4	1	5	5	5	5	3	4	5	5	2	1
2
2	3	2	5	5	5	5	5	5	4	4	5	2	5	3	5	4	5	5	3	5	4	5	5	5	5	5	4	5	5	5	3	5	5	5	5	4	5	5	4	4	3	5	4	4
2	4	4	3	5	3	2	4	2	4	4	3	4	4	4	3	4	4	2	4	4	4	5	4	4	4	4	5	4	4	4	4	4	3	4	2	4	4	3	4	4	4	4	2	3
2	5	4	5	4	4	3	4	5	1	4	4	5	5	1	1	4	5	5	2	2	3	5	5	3	1	4	4	4	2	4	4	5	5	1	2	5	4	5	1	4	4	5	5	1
2	5	4	4	3	2	5	4	4	2	3	4	5	4	4	1	2	4	2	4	3	5	4	4	2	2	2	4	2	2	4	4	5	4	3	2	4	2	2	4	2	4	4	1	1
1	4	5	4	5	4	5	5	5	5	3	4	3	5	5	4	5	5	4	5	4	5	5	3	5	3	4	5	5	3	1	5	5	4	5	4	4	5	5	5	4	2	4	4	1
2	3	4	5	2	5	3	4	3	2	5	1	5	5	2	2	4	5	1	2	5	3	4	2	3	5	3	5	3	3	5	4	5	4	5	5	5	5	3	2	5	5	5	2	4
2	3	5	4	5	4	4	5	3	5	5	5	5	5	4	4	4	5	4	5	4	4	5	5	5	4	4	5	4	5	5	4	5	4	5	3	4	5	3	5	3	5	5	3	5
2	5	4	5	4	5	4	4	3	4	5	5	5	4	1	3	5	5	4	2	5	3	5	3	4	5	5	5	5	4	5	4	5	4	5	3	5	5	4	2	3	5	4	2	5
2	4	2	5	3	4	5	4	5	4	5	5	5	5	3	3	5	4	4	4	4	4	5	5	4	3	5	4	4	4	4	5	4	4	4	4	5	4	4	5	4	5	4	2	2
1	2	5	5	1	2	3	5	3	1	4	3	3	4	1	3	3	5	5	1	4	1	5	2	1	3	3	3	4	2	3	1	5	5	1	2	1	3	3	1	2	4	2	1	1
